1 **Title:** Sense-and-respond payload delivery using a novel antigen-inducible promoter  
2 improves suboptimal CAR-T activation

3  
4

5 **Authors:** Tingxi Guo<sup>1\*</sup>, Dacheng Ma<sup>1\*</sup>, Timothy K. Lu<sup>1,2,3</sup>

6

7 <sup>1</sup>Synthetic Biology Group, Research Laboratory of Electronics, Massachusetts Institute of  
8 Technology, Cambridge, MA 02139, USA.

9 <sup>2</sup>Synthetic Biology Center, Department of Biological Engineering, Massachusetts Institute of  
10 Technology, Cambridge, MA 02139, USA.

11 <sup>3</sup>Department of Electrical Engineering and Computer Science, Massachusetts Institute of  
12 Technology, Cambridge, MA 02139, USA.

13

14 \*These authors contributed equally.

15 Correspondence and requests for materials should be addressed to T.K.L. ([timlu@mit.edu](mailto:timlu@mit.edu)).

16 **ABSTRACT**

17 Chimeric antigen receptor (CAR)-T cell therapies demonstrate the clinical potential of  
18 lymphocytes engineered with synthetic properties. However, CAR-T cells are ineffective in  
19 most solid tumors, partly due to inadequate activation of the infused lymphocytes at the site of  
20 malignancy. To selectively enhance anti-tumor efficacy without exacerbating off-target  
21 toxicities, CAR-T cells can be engineered to preferentially deliver immunostimulatory  
22 payloads in tumors. Here, we report a novel antigen-inducible promoter and single-vector  
23 sense-and-respond circuit for conditional payload expression in primary human T cells. In  
24 therapeutic T cell models, the novel NR4A-based promoter induced higher transgene  
25 expression than the conventional NFAT-based promoter under weakly immunogenic  
26 conditions, where payload expression is most needed. Minimal activity was detected from the  
27 inducible promoters in the absence of antigen and after withdrawal of stimulation. As a  
28 functional proof-of-concept, we used the NR4A-based promoter to express cytokines in an  
29 anti-mesothelin CAR-T model with suboptimal stimulation, and observed improved  
30 proliferation compared to T cells engineered with the conventional NFAT promoter or CAR  
31 alone. Our single-vector circuit achieves CAR-directed payload expression under weakly  
32 immunogenic conditions and could enable the next generation of cell therapies with enhanced  
33 anti-tumor efficacy.

34 Genetically programming cell functions with synthetic components holds promise for a  
35 variety of clinical applications. A notable example is the adoptive transfer of T lymphocytes  
36 engineered with a chimeric antigen receptor (CAR) to treat cancer<sup>1, 2</sup>. However, the consistent  
37 clinical benefit of these therapies has been largely limited to hematological malignancies.  
38 Most carcinomas remain non-responsive to CAR-T cells because the suppressive tumor  
39 microenvironment and variable antigen density prevent adequate activation of lymphocytes<sup>3, 4,</sup>  
40 <sup>5</sup>. Amplifying the suboptimal responses of therapeutic T cells without exacerbating immune-  
41 mediated toxicity is a major unmet need for the treatment of solid tumors.

42 Beyond antigen receptors, adoptively transferred anti-tumor T cells can also be  
43 engineered to produce immunostimulatory payloads<sup>6</sup>. This strategy to augment immune  
44 responses can enhance the therapeutic properties of the infused T cells and reinvigorate  
45 endogenous immune cells. In preclinical models, T cells engineered to secrete common  
46 gamma chain cytokines IL-2, IL-7, IL-15, and IL-21<sup>7</sup>; inflammatory cytokines IL-12<sup>8</sup>, IL-18<sup>9</sup>,  
47 and IL-23<sup>10</sup>; or other protein-based therapeutics<sup>11, 12</sup> have demonstrated superior tumor  
48 control compared to non-producers. The continuous secretion of stimulatory payloads,  
49 however, may counteract their beneficial effects. In one case, human T cells engineered to  
50 constitutively produce IL-15 resulted in the transformation of transductants in an IL-15  
51 receptor-dependent manner<sup>13</sup>. Constitutive production of potent cytokines such as IL-2 or IL-  
52 18 also caused toxicities in pre-clinical CAR-T models<sup>7, 9</sup>. These observations highlight the  
53 need to tightly control recombinant payload production and, ideally, restrict it to the tumor site  
54 to maximize its clinical benefit and prevent unwanted side-effects<sup>14</sup>.

55 A synthetic biology approach could leverage the antigen receptor signaling in  
56 engineered lymphocytes to specify where the stimulatory payloads should be produced. A  
57 sensitive, antigen-inducible promoter with low background activity could localize payload  
58 delivery. The conventional approach for antigen-dependent transgene expression has been to  
59 use an NFAT-based promoter<sup>15</sup> encoding an NFAT/AP1 response element derived from the  
60 human IL-2 enhancer<sup>16</sup>. This NFAT promoter was tested in the clinic to drive inducible  
61 expression of IL-12 and was transduced to *ex vivo* expanded tumor-infiltrating lymphocytes<sup>17</sup>.  
62 Toxicities were still observed after infusion, possibly because of non-localized production of  
63 IL-12 by T cells with unknown antigen specificities. Subsequent pre-clinical developments  
64 have focused on combining the antigen-inducible NFAT promoter with a recombinant  
65 receptor<sup>9, 14, 18</sup> to better control the input signal for conditional payload expression. Despite its  
66 broad use, the standard NFAT promoter may not be the optimal choice for payload delivery.

67 Here, we identified a novel synthetic promoter based on an NR4A-binding motif that  
68 induced greater responses than the conventional NFAT promoter under weakly stimulatory  
69 conditions, which is when immune-enhancing molecules are most needed. We also describe  
70 a single-vector circuit that incorporates this synthetic promoter to achieve an automated  
71 payload response via CAR sensing of the cognate tumor antigen. The engineered T cells  
72 respond to targets in an antigen-dependent manner and conditionally express a transgene of  
73 choice upon antigen engagement. The inducible promoter and vector design described here  
74 could enable future generations of synthetic lymphocytes, with controllable input and output to  
75 safely enhance therapeutic responses.

76

## 77 RESULTS

### 78 ***A novel antigen-inducible promoter encoding an NR4A-binding motif***

79 We previously generated a synthetic promoter library termed Synthetic Promoters with  
80 Enhanced Cell-State Specificity (SPECS), based on transcription factor (TF) binding motifs  
81 found in public databases. SPECS vectors were constructed by encoding repeated TF  
82 binding sites upstream of a minimal promoter derived from the adenoviral major late promoter  
83 (MLP) and mKate as the fluorescent reporter<sup>19</sup>. In the present study, to identify novel antigen  
84 receptor-inducible promoters from this library, we selected individual candidate promoters  
85 encoding binding sites for known TFs directly downstream of T cell receptor (TCR) signaling  
86 pathways (i.e., NFκB and MAPK targets)<sup>16, 20, 21, 22, 23, 24, 25, 26</sup>, or TFs upregulated upon TCR-  
87 induced activation<sup>27, 28, 29, 30, 31, 32, 33, 34</sup>. TF binding site sequences ranged from 77-126 base  
88 pairs (bp) (Supplementary Table 1). Individual promoter vectors were transduced into primary  
89 human T cells by lentivirus and stimulated with plate-bound CD3 agonist OKT3, or left  
90 untreated as a control (Supplementary Fig. 1A). Among the tested promoters, the one  
91 encoding an NR4A-binding motif induced the highest percentage of reporter positive cells  
92 compared to other candidates (Supplementary Fig. 1B and 1D) and was selected for  
93 characterization. An AP1-based promoter was also chosen for comparison, because the AP1  
94 pathway is well-established in T cell activation<sup>35</sup>. As an internal positive control, CD137  
95 upregulation<sup>36</sup> was measured in all assays to ensure similar activation among experiments  
96 (Supplementary Fig. 1C).

97 Next, we compared the SPECS-derived NR4A and AP1 promoters with the  
98 conventional NFAT promoter for OKT3-inducible responses. To facilitate quantitative  
99 comparisons, we introduced a second downstream transcription module into the lentiviral  
100 vector. In this module, the constitutive EFS promoter drives expression of truncated CD271  
101 (tCD271) to mark transduced cells. We also tested an additional synthetic minimal promoter  
102 (SMP)<sup>37</sup> in combination with each of the three response elements (Fig. 1A). The SMP and a  
103 similar variant enabled robust inducible promoter activity in human cells<sup>18, 38</sup>. All of the  
104 promoter vectors transduced cells with comparable efficiency at ~60-80% (Supplementary  
105 Fig. 2A). As a negative control vector, we cloned the EFS-tCD271 module alone, without  
106 inducible promoters or mKate. All of the tested promoters responded similarly to the CD3  
107 agonist among CD4 and CD8 subsets of primary human T cells after one day of stimulation  
108 (Fig. 1B). In certain donors or in a TF-dependent context, SMP performed better than MLP,  
109 although no consistent differences were observed (Fig. 1B and 1C). Thus, subsequent  
110 experiments were performed with SMP as the minimal promoter. No significant baseline  
111 activity in the absence of stimulation was observed with any of the inducible promoters (Fig.  
112 1B). Using a set of vectors with only a minimal promoter sequence upstream of mKate, we did  
113 not detect enhancer-like activity from the constitutive EFS promoter at the steady-state or  
114 after activation, regardless of the choice of minimal promoter (Supplementary Fig. 3).

115 To investigate whether the TCR-inducible promoters could be activated by non-CD3  
116 dependent mechanisms, we cultured the promoter-transduced cells in conditioned media  
117 derived from strongly activated T cells to mimic an inflammatory milieu (Supplementary Fig.

118 4A). The NFAT, AP1, and NR4A promoters were activated at similarly low levels (~10%)  
119 when the transduced cells were cultured in the conditioned media compared to normal media.  
120 Reporter activity induced by the conditioned media was substantially lower than CD3-induced  
121 responses (Supplementary Fig. 4B and 4C). Thus, we have identified a novel NR4A-based  
122 promoter with anti-CD3 inducible activity, and a single lentiviral vector system that permits  
123 stringent conditional gene expression alongside constitutive gene expression.

124

### 125 ***Inducible promoters demonstrate reversible and repeatable activation***

126 We next investigated the activity of the inducible promoters after withdrawal of antigen  
127 receptor stimulation. Using the vectors shown in Figure 1A, we observed that it took up to 5  
128 days after removing the source of stimulation for the mKate fluorescence to dissipate  
129 (Supplementary Fig. 2B), suggesting high stability of the fluorescent protein. To measure the  
130 reversibility and repeatability of inducible promoter activation, we changed the reporter to a  
131 destabilized enhanced yellow fluorescent protein (dEYFP) encoding an additional PEST motif,  
132 which reduces the half-life of fluorescent proteins<sup>39</sup>. In this system, the reporter fluorescence  
133 is more closely coupled to promoter activity. After transducing the dEYFP vectors in human T  
134 cells, we stimulated the cells for one day with OKT3 as above, then transferred the cells to a  
135 fresh well without the agonist for three days of rest. This process was repeated three times  
136 (Fig. 2A). The EFS-tCD271 vector again served as a negative control. Across three  
137 sequential stimulations, the NFAT, AP1, and NR4A promoter activities consistently returned  
138 to baseline after three days of rest in CD8 T cells. In fact, the fluorescence intensity for all  
139 reporters was reduced by at least 50% after only one day (Fig. 2B-D).

140 Interestingly, normalized responses were moderately higher after the second  
141 stimulation (Fig. 2B, 2C, and Supplementary Fig. 5A), akin to a recall response in adaptive  
142 lymphocytes. The lower responses observed after the third stimulation (Fig. 2D and  
143 Supplementary Fig. 5A) were likely the result of activation-induced cell death. Reversible  
144 responses were also observed in CD4 T cells with at least one round of stimulation  
145 (Supplementary Fig. 5B). Repeated OKT3 stimulation biased the outgrowth of CD4<sup>+</sup> cells and  
146 decreased the overall viability of most samples (Supplementary Fig. 5C); thus, the promoter  
147 responses in the CD4 subset after multiple rounds of activation could not be reliably  
148 measured. Throughout the course of the experiment, the proportion of CD271<sup>+</sup> cells did not  
149 change significantly (Supplementary Fig. 5D), indicating that repeated activation of the  
150 promoters was well tolerated and did not cause a growth disadvantage.

151

### 152 ***NR4A promoter induces higher responses than NFAT and AP1 in weakly immunogenic, 153 therapeutically relevant models***

154 Although OKT3 is a potent activator of T cells, it is not representative of therapeutically  
155 relevant receptor-antigen interactions. To characterize the inducible promoter responses in  
156 more appropriate models, we first selected a CAR based on the humanized single-chain  
157 variable fragment (scFv) M5, targeting the widely expressed mesothelin tumor antigen<sup>40</sup>. The  
158 M5 CAR, which encodes 41BB and CD3z signaling domains (M5-BBz), is currently being  
159 tested in clinical trials for treating a variety of solid tumors (NCT03054298, NCT03323944).

160 Mesothelin-targeting CAR-T strategies have yet to yield consistent objective responses<sup>41</sup> and,  
161 therefore, could benefit from the addition of inducible payloads. To investigate the inducible  
162 promoter activity in a CAR setting, the M5-BBz CAR and tCD271, separated by a porcine 2A  
163 (P2A) sequence, were encoded downstream of the EFS promoter for constitutive expression.  
164 In these constructs, inducible promoters that drive the expression of mKate as a reporter were  
165 cloned upstream of the CAR. tCD271 with the receptor alone served as a control vector (Fig.  
166 3A). T cells were transduced with the vectors and stimulated with HEK293T (no mesothelin),  
167 A549 (low mesothelin), or OVCAR8 (high mesothelin) target cells<sup>42, 43</sup>.

168 Among the transduced CD8 and CD4 T cells, we observed no mKate fluorescence  
169 when effector cells were cultured with HEK293T, again demonstrating minimal antigen-  
170 independent promoter activity (Fig. 3B). Similar levels of reporter expression were observed  
171 with the strong OVCAR8 stimulation. Notably, the NR4A promoter induced significantly more  
172 mKate expression than the NFAT and AP1 promoters when cultured with the weakly  
173 stimulatory A549 targets (Fig. 3B and Supplementary Fig. 6A). OVCAR8 was indeed more  
174 immunogenic than A549 in the M5 model based on CD137 upregulation (Fig. 3G and  
175 Supplementary Fig. 6A). Doubling the number of NFAT binding sites only marginally improved  
176 the response, which was still lower than that of NR4A in the M5-BBz/A549 system  
177 (Supplementary Fig. 7). A similar trend was observed when the promoters were tested with a  
178 CD28-based M5 CAR (M5-28z, Fig. 3C): the NR4A promoter responded at higher levels than  
179 the standard NFAT in response to A549 stimulation (Fig. 3D and Supplementary Fig. 6A). In  
180 the M5-28z model, AP1 demonstrated higher activity than NR4A in response to OVCAR8  
181 (Fig. 3D). Inducible promoter vectors for both CARs were transduced at ~50-70% efficiency  
182 (Supplementary Fig. 6B).

183 Next, we constructed a similar set of vectors using the affinity-matured HLA-  
184 A2/NYESO1-specific 1G4 TCR<sup>44</sup> as the model antigen receptor. 1G4 TCR has demonstrated  
185 clinical efficacy in treating melanoma and synovial sarcoma<sup>45, 46</sup>. The two P2A sequences  
186 between tCD271, TCR $\alpha$ , and TCR $\beta$  genes were codon-modified to avoid repetition in the viral  
187 genome (Fig. 3E). TCR-T cells were stimulated with HEK293T or A375. Both of these cell  
188 lines express HLA-A2 but only A375 expresses the cognate antigen<sup>44, 47</sup>. In the TCR model,  
189 NR4A also responded with consistently higher reporter positivity than NFAT or AP1 after co-  
190 culture with A375, although the overall responses were lower than those seen with the CAR  
191 models. The promoters induced higher responses in CD8 T cells than in CD4 cells (Fig. 3F),  
192 which was expected since the 1G4 TCR is HLA class I restricted. The lower levels of CD137  
193 upregulation in the TCR model were consistent with the weaker promoter activity (Fig. 3G),  
194 which may have been caused by the insufficient formation of the correct TCR $\alpha$ / $\beta$  pairing (see  
195 Discussion). The TCR constructs were ~400bp larger than the CAR vectors and were  
196 transduced less efficiently (Supplementary Fig. 6B). Nevertheless, across all of the receptor  
197 models tested in our study, we observed significantly higher responses with the NR4A-based  
198 promoter compared to the responses observed with the standard NFAT promoter under  
199 poorly stimulatory conditions — precisely the context where payload expression is needed.

200

## 201 ***Recombinant cytokines expressed under the NR4A promoter amplify weak anti-tumor*** 202 ***responses***

203 As a proof-of-concept, we generated inducible constructs to conditionally express IL-2  
204 and IL-21 in the clinically relevant M5-BBz model. The mKate reporter gene of the M5-BBz  
205 CAR vectors (Fig. 3A) was replaced with recombinant IL-2 and IL-21, separated by a P2A  
206 sequence (Fig. 4A). Constitutive expression of either cytokine alone has been reported to  
207 enhance the proliferation of CD19 CAR-T cells<sup>7</sup>. Although both of these common gamma  
208 chain cytokines can be produced endogenously by activated human T cells, cytokine  
209 production is poor when the cells are suboptimally stimulated at low antigen density<sup>48, 49, 50</sup>.  
210 Therefore, we reasoned that the NR4A-based synthetic promoter system could supplement  
211 these beneficial cytokines under conditions that preclude endogenous production.

212 In a proliferation assay without cytokine supplementation in the media, CAR-T cells  
213 transduced with the control M5-BBz or inducible IL2/IL21 vectors demonstrated low levels of  
214 proliferation in the absence of stimulation. In contrast, the majority of the cells divided after  
215 co-culture with the immunogenic OVCAR8 cells. When stimulated with the weakly  
216 immunogenic A549 targets, more of the NR4A-IL2/IL21 transductants proliferated compared  
217 to cells engineered with other vectors. The improvement in proliferation was more  
218 pronounced for the CD8 than CD4 subset (Fig. 4B and 4C), consistent with a past study  
219 showing that IL-2 improves the proliferation of suboptimally stimulated CD8 but not of CD4  
220 murine T cells<sup>51</sup>. Based on additional experiments in which the NR4A promoter induced  
221 expression either of cytokines or mKate as a control (Fig. 4D), we determined that the  
222 enhanced proliferation in response to A549 was payload-dependent, at least in CD8+ CAR-T  
223 cells (Fig. 4E and 4F). Transduction efficiencies of the inducible cytokine constructs were  
224 similar (Supplementary Fig. 8 and 9C).

225 Consistent with the above data, more of the CAR-T cells encoding the NR4A-IL2/IL21  
226 module produced IL-2 when stimulated with A549, compared to cells transduced with other  
227 inducible modules or the control vector (Supplementary Fig. 9A and 9B). Moreover, in A549  
228 co-cultures, proliferation of NFAT-IL2/IL21 CAR-T cells was not increased compared to  
229 control CAR-T cells (Fig. 4C and 4F), in line with the low responses observed with the NFAT  
230 promoter in Figure 3B. Across these experiments, inducible expression of the cytokines did  
231 not significantly enhance proliferation compared to CAR alone when cells were cultured with  
232 OVCAR8 (Fig. 4C and 4F). In summary, these data demonstrate a proof-of-concept that  
233 payloads delivered via the single-vector system using the NR4A promoter can augment  
234 suboptimal CAR-T responses.

235

## 236 **DISCUSSION**

237 In this study, we identified a novel antigen-inducible transcriptional response element  
238 in human T cells based on a TF binding site of the NR4A family. Notably, the NR4A-based  
239 promoter outperformed the conventional NFAT-based promoter under poorly stimulatory  
240 conditions. Given that at least NR4A1 expression is partly dependent on calcium and MAPK  
241 signaling<sup>52</sup>, it is interesting that our NR4A-based promoter was more responsive than NFAT  
242 and AP1-based promoters. The NR4A family of TFs could simply be more potent

243 transcriptional activators in primary human T cells. Alternatively, the choice of TF binding  
244 motif or vector design used here may promote transcription for NR4A more than for NFAT or  
245 AP1. Future molecular and biochemical studies are required to elucidate the mechanism  
246 underlying the differential activity between respective promoters at various signaling  
247 intensities. NFAT and AP1-based synthetic promoters may also be disadvantageous because  
248 they sequester critical TFs away from endogenous response elements that are needed to  
249 potentiate activation, especially with weak signals. Meanwhile, NR4A TFs have been  
250 implicated as negative regulators of T cell activation<sup>53, 54</sup> and thus the cognate synthetic  
251 promoter would be unlikely to interfere with endogenous activation pathways.

252 TCR-induced activation of the NR4A pathway has been characterized previously<sup>31, 52,</sup>  
253 <sup>55</sup>. This pathway has been used to monitor TCR signaling by knocking-in a reporter at the  
254 NR4A1 locus<sup>55, 56, 57</sup>. In theory, payload transgenes could also be knocked-in at the NR4A1  
255 site to achieve inducible expression, and improvements in site-specific integration  
256 technologies for primary lymphocytes<sup>58, 59, 60</sup> will facilitate the practical implementation of this  
257 approach. With the knock-in method, however, transcriptional output will be dictated by  
258 endogenous elements, which lacks the flexibility afforded by a synthetic promoter system that  
259 can be tuned for a variety of applications. Our promoter platform similarly leverages the NR4A  
260 pathway; instead of relying on endogenous response elements to drive NR4A1 transcription,  
261 a short sequence encoding an NR4A-binding motif is used to drive conditional gene  
262 expression, which is readily implemented using a standard lentiviral vector. Compared to  
263 other systems in which the inducible module is transduced via a vector separate from the  
264 antigen receptor<sup>14</sup>, our single-vector platform simplifies the manufacturing process and avoids  
265 the heterogeneity in the final therapeutic product generated by multi-vector transduction.

266 The EFS promoter was used here to constitutively express the recombinant antigen  
267 receptor. At ~200bp, it is one of the most compact constitutive promoters; the small size is  
268 advantageous for incorporation into the large vectors designed in this study. Other compact  
269 constitutive promoters, such as MND, tend to possess enhancer-like activity and can  
270 influence the transcriptional activity of neighboring promoters<sup>61, 62, 63, 64</sup>. Such cross-distance  
271 activity would interfere with the upstream promoter for achieving stringent inducible  
272 transcription. Although the EFS promoter is weaker than MND<sup>65</sup>, we did not detect enhancer-  
273 like properties, consistent with published data<sup>64</sup>. However, stronger constitutive promoters  
274 may be needed to practically implement this system with recombinant TCRs, which must  
275 compete with endogenous TCR hemichains to form antigen-specific surface receptors<sup>66</sup>. The  
276 low level of response observed in our 1G4 model is likely caused by insufficient expression of  
277 TCR $\alpha/\beta$  chains by the EFS promoter. Efforts to engineer potent and compact constitutive  
278 promoters without enhancer-like attributes, or inducible promoters that are resistant to distal  
279 enhancers, are needed.

280 In our proof-of-concept experiment, the inducible expression of common gamma chain  
281 cytokines by the NR4A promoter improved proliferation of otherwise poorly responsive CAR-T  
282 cells. Activation at a lower immunogenic threshold is a critical feature of the NR4A antigen-  
283 inducible promoter that could widen the therapeutic index for a wide range of molecular  
284 therapeutics compared to systemic or constitutive delivery. Some examples of applications



285 include site-specific production of: bispecific engagers to trigger bystander lymphocyte  
286 responses; chemokines to promote infiltration of immune effectors; or cell-intrinsic regulators  
287 (e.g., TFs) to conditionally re-program engineered cells in an autonomous manner. These and  
288 other applications can be explored in future pre-clinical studies. In conclusion, the platform  
289 described in this study could empower a variety of synthetic biology approaches to overcome  
290 current challenges in adoptive cell immunotherapies.

291

## 292 **METHODS**

### 293 ***Cell culture***

294 HEK293T, A375, A549, and Jurkat.E6 cell lines were obtained from the American Type  
295 Culture Collection (ATCC, Manassas, VA). OVCAR8 was a gift from Dr. Sangeeta N. Bhatia  
296 (Massachusetts Institute of Technology, Cambridge, MA). HEK293T, A375, A549, and  
297 OVCAR8 cell lines were cultured in DMEM (Thermo Fisher Scientific, Waltham, MA; catalog  
298 #10569010). Primary human T cells and the Jurkat.E6 cell line were cultured in RPMI-1640  
299 (Thermo Fisher Scientific; catalog #11875119). All media were supplemented with 10% fetal  
300 bovine serum (Corning; catalog #35-010-CV) and 1% penicillin/streptomycin (Thermo Fisher  
301 Scientific; catalog #15140122).

302

### 303 ***Generation of lentiviral vectors***

304 Truncated CD271 (tCD271)-CAR or TCR, EYFP destabilized with a PEST motif (dEYFP), and  
305 IL-2/IL-21 fragments were synthesized as gBlocks by Integrated DNA Technologies  
306 (Coralville, IA). The M5 scFv sequence was derived from the patent WO2015/090230.  
307 Sequences of 28z and BBz signaling domains, and the affinity-matured 1G4 TCR were as  
308 previously described<sup>44, 67</sup>. Except NFAT, all TF binding site and mKate sequences were  
309 derived from SPECS plasmids (Addgene #127842). The NFAT response element was  
310 subcloned from the pSIRV-NFAT-eGFP plasmid<sup>68</sup> (a gift from Peter Steinberger, Addgene  
311 plasmid # 118031). The EYFP sequence was derived from Addgene plasmid #51791 and the  
312 PEST sequence was derived from Addgene plasmid #69072. The EFS promoter was  
313 subcloned from the lentiCRISPRv2 plasmid (a gift from Feng Zhang, Addgene plasmid #  
314 52961). The EFS promoter and tCD271-CAR/TCR fragments were first assembled into a  
315 lentiviral backbone vector (derived from pFUGW in-house) in the reverse orientation of the  
316 long-terminal repeats. Inducible promoter and reporter or payload genes were then inserted  
317 upstream of the EFS promoter. Inserted sequences were confirmed by Sanger sequencing  
318 (GENEWIZ, South Plainfield, NJ). Each set of NFAT, AP1, or NR4A vectors only differed at  
319 the TF binding sequence.

320

### 321 ***Lentivirus production***

322 Lentivirus was generated by transfecting HEK293T cells of less than 10 passages and grown  
323 to ~80% confluency in T25 flasks, with 1.5µg of pMD2.G (a gift from Didier Trono, Addgene  
324 plasmid # 12259), 3.5µg of psPAX2 (a gift from Didier Trono, Addgene plasmid # 12260), and  
325 5µg of respective transfer plasmid using the TransIT-2020 reagent (MirusBio, Japan). Media  
326 was changed to fresh complete DMEM 16-24 hours post-transfection, and lentivirus was

327 collected after another 24 hours to be used immediately or stored at -80°C. Virus was titered  
328 by infecting Jurkat.E6 at limiting dilutions.

329

### 330 ***Lentiviral transduction of primary human T cells***

331 Peripheral blood mononuclear cells (PBMCs) were isolated by density gradient centrifugation  
332 from apheresis products of healthy donors (Brigham and Women's Hospital Crimson Core,  
333 Boston, MA). Primary human T cells were purified from PBMCs by Pan T Cell Isolation Kit  
334 (Miltenyi Biotec, Germany). Purified T cells were stimulated with anti-CD3/CD28 Dynabeads  
335 (Thermo Fisher Scientific) at a T cell:bead ratio of 1:2. After 24 hours, Dynabeads were  
336 removed and stimulated T cells were seeded on Retronectin (Takara Bio, Japan) coated non-  
337 tissue culture treated plate with virus, and centrifuged at 1200xg, 32°C for 30 min. One time  
338 infection was carried out for the smaller vectors shown in Figures 1 and 2 at a multiplicity of  
339 infection (MOI) of 5-10. Larger vectors shown in Figure 3 and 4 were infected at a MOI of 10-  
340 20, spread out over 2 days of daily infection. During stimulation and infection, T cells were  
341 supplemented daily with 100U/ml of IL-2 and 10ng/ml of IL-15 (NCI Preclinical Repository,  
342 Frederick, MD). After infection, T cells were maintained by supplementing with 100U/ml of IL-  
343 2 and 10ng/ml of IL-15 every 3 days. T cells were expanded for another 5-6 days after the last  
344 infection prior to use in experiments.

345

### 346 ***Flow cytometry***

347 The following monoclonal antibodies (BioLegend, San Diego, CA) were used in this study:  
348 anti-human CD3 (clone UCHT1), anti-human CD4 (clone RPA-T4), anti-human CD8 (clone  
349 RPA-T8), anti-human CD271 (clone ME20.4), anti-human CD69 (clone FN50), anti-human  
350 CD137 (clone 4B4-1), and anti-human IL-2 (clone MQ1-17H12). Surface staining was carried  
351 out at 4°C for 15 min with a master mix of antibodies. For intracellular staining of IL-2, cells  
352 were fixed and permeabilized after surface staining using the Cytotfix/Cytoperm kit (BD  
353 Biosciences). Stained cells were analyzed with a FACSCantoll,  
354 FACSCelesta, or LSRFortessa flow cytometer (BD Biosciences). Data analysis was  
355 performed with FlowJo. All data shown were gated on singlets and live cells, determined by  
356 Aqua fixable dye (Thermo Fisher Scientific) for mKate-expressing and intracellular  
357 experiments, or 7-aminoactinomycin D (BioLegend) for all other experiments.

358

### 359 ***T cell stimulation assays***

360 For plate-bound stimulations, non-tissue culture treated plates were coated with 2µg/ml anti-  
361 CD3 clone OKT3 (NCI Preclinical Repository) with or without 2µg/ml anti-CD28 clone CD28.2  
362 (BioLegend) by incubating at 4°C overnight. The same volume of PBS (Thermo Fisher  
363 Scientific) was used as a control treatment. Antibody or PBS solution was removed and T  
364 cells were seeded to the treated wells and cultured for 24 hours. Cells were analyzed post-  
365 stimulation or transferred to fresh tissue-culture treated wells to rest. For cell-based co-culture  
366 stimulations, T cells were mixed with HEK293T, A375, A549, or OVCAR8 targets at an  
367 effector:target (ET) ratio of 3:1 and cultured for 24 hours to measure reporter fluorescence.  
368 For intracellular IL-2 detection, CAR-T cells were cultured with targets at a 3:1 ET ratio for 18

369 hours, followed by treatment with 1500x diluted monesin (BD Biosciences) for 6 hours. To  
370 measure proliferation, T cells were washed with PBS and labeled with 1 $\mu$ M of  
371 carboxyfluorescein succinimidyl ester (CFSE, Thermo Fisher Scientific) by incubating them at  
372 37°C for 5 min. Labeled cells were washed with complete media and co-cultured with A549 or  
373 OVCAR8 target cells at an ET ratio of 10:1. CFSE dilution was assessed after 4 days of co-  
374 culture.

375

### 376 **Statistics**

377 Comparisons between more than two groups were performed by two-way analysis of variance  
378 (ANOVA) with Tukey's multiple comparisons test. Differences were considered significant at  
379 an adjusted P value of less than 0.05. All statistical analyses were performed using GraphPad  
380 Prism 6. Error bars denote one standard deviation.

381

### 382 **ACKNOWLEDGEMENTS**

383 This work was supported in part by the Department of Defense (W81XWH-17-1-0159,  
384 W81XWH-16-1-0565) and National Institutes of Health (5-R33-AI121669-04). T.G. was  
385 supported by a Postdoctoral Fellowship from the Natural Sciences and Engineering Research  
386 Council of Canada. We thank the flow cytometry core facility at the Koch Institute for  
387 Integrative Cancer Research at Massachusetts Institute of Technology. We thank Karen  
388 Pepper for editing the manuscript.

389

### 390 **AUTHOR CONTRIBUTIONS**

391 T.G., D.M., and T.K.L. designed the experiments, analyzed the data, and wrote the  
392 manuscript. T.G. and D.M. performed the experiments. T.K.L. supervised the study.

393

### 394 **COMPETING INTERESTS**

395 T.K.L. is a co-founder of Senti Biosciences, Synlogic, Engine Biosciences, Tango Therapeutics,  
396 Corvium, BiomX, Eligo Biosciences, Bota.Bio, and Avendesora. T.K.L. also holds financial  
397 interests in nest.bio, Ampliphi, IndieBio, MedicusTek, Quark Biosciences, Personal Genomics,  
398 Thryve, Lexent Bio, MitoLab, Vulcan, Serotiny, and Avendesora. Other authors declare no  
399 competing interests.

400 **REFERENCES**

401

- 402 1. Lim WA, June CH. The Principles of Engineering Immune Cells to Treat Cancer. *Cell*  
403 **168**, 724-740 (2017).  
404
- 405 2. Sadelain M, Riviere I, Riddell S. Therapeutic T cell engineering. *Nature* **545**, 423-431  
406 (2017).  
407
- 408 3. Anderson KG, Stromnes IM, Greenberg PD. Obstacles Posed by the Tumor  
409 Microenvironment to T cell Activity: A Case for Synergistic Therapies. *Cancer cell* **31**,  
410 311-325 (2017).  
411
- 412 4. Rafiq S, Hackett CS, Brentjens RJ. Engineering strategies to overcome the current  
413 roadblocks in CAR T cell therapy. *Nature reviews Clinical oncology* **17**, 147-167  
414 (2020).  
415
- 416 5. Shah NN, Fry TJ. Mechanisms of resistance to CAR T cell therapy. *Nature reviews*  
417 *Clinical oncology* **16**, 372-385 (2019).  
418
- 419 6. Yeku OO, Brentjens RJ. Armored CAR T-cells: utilizing cytokines and pro-inflammatory  
420 ligands to enhance CAR T-cell anti-tumour efficacy. *Biochem Soc Trans* **44**, 412-418  
421 (2016).  
422
- 423 7. Markley JC, Sadelain M. IL-7 and IL-21 are superior to IL-2 and IL-15 in promoting  
424 human T cell-mediated rejection of systemic lymphoma in immunodeficient mice. *Blood*  
425 **115**, 3508-3519 (2010).  
426
- 427 8. Koneru M, Purdon TJ, Spriggs D, Koneru S, Brentjens RJ. IL-12 secreting tumor-  
428 targeted chimeric antigen receptor T cells eradicate ovarian tumors in vivo.  
429 *Oncoimmunology* **4**, e994446 (2015).  
430
- 431 9. Hu B, *et al.* Augmentation of Antitumor Immunity by Human and Mouse CAR T Cells  
432 Secreting IL-18. *Cell reports* **20**, 3025-3033 (2017).  
433
- 434 10. Ma X, *et al.* Interleukin-23 engineering improves CAR T cell function in solid tumors.  
435 *Nature biotechnology* **38**, 448-459 (2020).  
436
- 437 11. Choi BD, *et al.* CAR-T cells secreting BiTEs circumvent antigen escape without  
438 detectable toxicity. *Nature biotechnology* **37**, 1049-1058 (2019).  
439
- 440 12. Rafiq S, *et al.* Targeted delivery of a PD-1-blocking scFv by CAR-T cells enhances  
441 anti-tumor efficacy in vivo. *Nature biotechnology* **36**, 847-856 (2018).  
442
- 443 13. Hsu C, *et al.* Cytokine-independent growth and clonal expansion of a primary human  
444 CD8+ T-cell clone following retroviral transduction with the IL-15 gene. *Blood* **109**,  
445 5168-5177 (2007).  
446

- 447 14. Chmielewski M, Abken H. TRUCKs: the fourth generation of CARs. *Expert opinion on*  
448 *biological therapy* **15**, 1145-1154 (2015).  
449
- 450 15. Zhang L, *et al.* Improving adoptive T cell therapy by targeting and controlling IL-12  
451 expression to the tumor environment. *Molecular therapy : the journal of the American*  
452 *Society of Gene Therapy* **19**, 751-759 (2011).  
453
- 454 16. Fiering S, Northrop JP, Nolan GP, Mattila PS, Crabtree GR, Herzenberg LA. Single cell  
455 assay of a transcription factor reveals a threshold in transcription activated by signals  
456 emanating from the T-cell antigen receptor. *Genes & development* **4**, 1823-1834  
457 (1990).  
458
- 459 17. Zhang L, *et al.* Tumor-infiltrating lymphocytes genetically engineered with an inducible  
460 gene encoding interleukin-12 for the immunotherapy of metastatic melanoma. *Clinical*  
461 *cancer research : an official journal of the American Association for Cancer Research*  
462 **21**, 2278-2288 (2015).  
463
- 464 18. Zimmermann K, *et al.* Design and Characterization of an "All-in-One" Lentiviral Vector  
465 System Combining Constitutive Anti-G(D2) CAR Expression and Inducible Cytokines.  
466 *Cancers (Basel)* **12**, (2020).  
467
- 468 19. Wu MR, *et al.* A high-throughput screening and computation platform for identifying  
469 synthetic promoters with enhanced cell-state specificity (SPECS). *Nature*  
470 *communications* **10**, 2880 (2019).  
471
- 472 20. Rincón M, Flavell RA. AP-1 transcriptional activity requires both T-cell receptor-  
473 mediated and co-stimulatory signals in primary T lymphocytes. *The EMBO journal* **13**,  
474 4370-4381 (1994).  
475
- 476 21. Kim HP, Leonard WJ. CREB/ATF-dependent T cell receptor-induced FoxP3 gene  
477 expression: a role for DNA methylation. *The Journal of experimental medicine* **204**,  
478 1543-1551 (2007).  
479
- 480 22. Muthusamy N, Barton K, Leiden JM. Defective activation and survival of T cells lacking  
481 the Ets-1 transcription factor. *Nature* **377**, 639-642 (1995).  
482
- 483 23. Youn HD, Sun L, Prywes R, Liu JO. Apoptosis of T cells mediated by Ca<sup>2+</sup>-induced  
484 release of the transcription factor MEF2. *Science* **286**, 790-793 (1999).  
485
- 486 24. Li Y, Sedwick CE, Hu J, Altman A. Role for protein kinase C $\theta$  (PKC $\theta$ ) in  
487 TCR/CD28-mediated signaling through the canonical but not the non-canonical  
488 pathway for NF- $\kappa$ B activation. *The Journal of biological chemistry* **280**, 1217-1223  
489 (2005).  
490
- 491 25. Charvet C, Auberger P, Tartare-Deckert S, Bernard A, Deckert M. Vav1 couples T cell  
492 receptor to serum response factor-dependent transcription via a MEK-dependent  
493 pathway. *The Journal of biological chemistry* **277**, 15376-15384 (2002).  
494

- 495 26. Malcolm T, Chen J, Chang C, Sadowski I. Induction of chromosomally integrated HIV-1  
496 LTR requires RBF-2 (USF/TFII-I) and Ras/MAPK signaling. *Virus genes* **35**, 215-223  
497 (2007).  
498
- 499 27. Safford M, *et al.* Egr-2 and Egr-3 are negative regulators of T cell activation. *Nature*  
500 *immunology* **6**, 472-480 (2005).  
501
- 502 28. de la Roche M, *et al.* Hedgehog signaling controls T cell killing at the immunological  
503 synapse. *Science* **342**, 1247-1250 (2013).  
504
- 505 29. Glasmacher E, *et al.* A genomic regulatory element that directs assembly and function  
506 of immune-specific AP-1-IRF complexes. *Science* **338**, 975-980 (2012).  
507
- 508 30. Ho IC, Hodge MR, Rooney JW, Glimcher LH. The proto-oncogene c-maf is responsible  
509 for tissue-specific expression of interleukin-4. *Cell* **85**, 973-983 (1996).  
510
- 511 31. Woronicz JD, Calnan B, Ngo V, Winoto A. Requirement for the orphan steroid receptor  
512 Nur77 in apoptosis of T-cell hybridomas. *Nature* **367**, 277-281 (1994).  
513
- 514 32. Wu Z, Kim HP, Xue HH, Liu H, Zhao K, Leonard WJ. Interleukin-21 receptor gene  
515 induction in human T cells is mediated by T-cell receptor-induced Sp1 activity.  
516 *Molecular and cellular biology* **25**, 9741-9752 (2005).  
517
- 518 33. Chikuma S, Suita N, Okazaki IM, Shibayama S, Honjo T. TRIM28 prevents  
519 autoinflammatory T cell development in vivo. *Nature immunology* **13**, 596-603 (2012).  
520
- 521 34. von Essen MR, Kongsbak M, Schjerling P, Olgaard K, Odum N, Geisler C. Vitamin D  
522 controls T cell antigen receptor signaling and activation of human T cells. *Nature*  
523 *immunology* **11**, 344-349 (2010).  
524
- 525 35. Foletta VC, Segal DH, Cohen DR. Transcriptional regulation in the immune system: all  
526 roads lead to AP-1. *Journal of leukocyte biology* **63**, 139-152 (1998).  
527
- 528 36. Wolf M, *et al.* Activation-induced expression of CD137 permits detection, isolation, and  
529 expansion of the full repertoire of CD8+ T cells responding to antigen without requiring  
530 knowledge of epitope specificities. *Blood* **110**, 201-210 (2007).  
531
- 532 37. Merlet E, *et al.* A calcium-sensitive promoter construct for gene therapy. *Gene therapy*  
533 **20**, 248-254 (2013).  
534
- 535 38. Ede C, Chen X, Lin MY, Chen YY. Quantitative Analyses of Core Promoters Enable  
536 Precise Engineering of Regulated Gene Expression in Mammalian Cells. *ACS Synth*  
537 *Biol* **5**, 395-404 (2016).  
538
- 539 39. Li X, *et al.* Generation of destabilized green fluorescent protein as a transcription  
540 reporter. *The Journal of biological chemistry* **273**, 34970-34975 (1998).  
541
- 542 40. Morello A, Sadelain M, Adusumilli PS. Mesothelin-Targeted CARs: Driving T Cells to  
543 Solid Tumors. *Cancer Discov* **6**, 133-146 (2016).

544

- 545 41. Haas AR, *et al.* Phase I Study of Lentiviral-Transduced Chimeric Antigen Receptor-  
546 Modified T Cells Recognizing Mesothelin in Advanced Solid Cancers. *Molecular*  
547 *therapy : the journal of the American Society of Gene Therapy* **27**, 1919-1929 (2019).  
548
- 549 42. Ho M, *et al.* Mesothelin expression in human lung cancer. *Clinical cancer research : an*  
550 *official journal of the American Association for Cancer Research* **13**, 1571-1575 (2007).  
551
- 552 43. Tang Z, *et al.* A human single-domain antibody elicits potent antitumor activity by  
553 targeting an epitope in mesothelin close to the cancer cell surface. *Molecular cancer*  
554 *therapeutics* **12**, 416-426 (2013).  
555
- 556 44. Robbins PF, *et al.* Single and dual amino acid substitutions in TCR CDRs can enhance  
557 antigen-specific T cell functions. *Journal of immunology* **180**, 6116-6131 (2008).  
558
- 559 45. Robbins PF, *et al.* A pilot trial using lymphocytes genetically engineered with an NY-  
560 ESO-1-reactive T-cell receptor: long-term follow-up and correlates with response.  
561 *Clinical cancer research : an official journal of the American Association for Cancer*  
562 *Research* **21**, 1019-1027 (2015).  
563
- 564 46. D'Angelo SP, *et al.* Antitumor Activity Associated with Prolonged Persistence of  
565 Adoptively Transferred NY-ESO-1 (c259)T Cells in Synovial Sarcoma. *Cancer Discov*  
566 **8**, 944-957 (2018).  
567
- 568 47. Zuo J, *et al.* The Epstein-Barr virus-encoded BILF1 protein modulates immune  
569 recognition of endogenously processed antigen by targeting major histocompatibility  
570 complex class I molecules trafficking on both the exocytic and endocytic pathways.  
571 *Journal of virology* **85**, 1604-1614 (2011).  
572
- 573 48. Abu-Shah E, *et al.* Human CD8(+) T Cells Exhibit a Shared Antigen Threshold for  
574 Different Effector Responses. *Journal of immunology* **205**, 1503-1512 (2020).  
575
- 576 49. Itoh Y, Germain RN. Single cell analysis reveals regulated hierarchical T cell antigen  
577 receptor signaling thresholds and intracлонаl heterogeneity for individual cytokine  
578 responses of CD4+ T cells. *The Journal of experimental medicine* **186**, 757-766  
579 (1997).  
580
- 581 50. Majzner RG, *et al.* Tuning the Antigen Density Requirement for CAR T-cell Activity.  
582 *Cancer Discov* **10**, 702-723 (2020).  
583
- 584 51. Au-Yeung BB, *et al.* IL-2 Modulates the TCR Signaling Threshold for CD8 but Not CD4  
585 T Cell Proliferation on a Single-Cell Level. *Journal of immunology* **198**, 2445-2456  
586 (2017).  
587
- 588 52. Ashouri JF, Weiss A. Endogenous Nur77 Is a Specific Indicator of Antigen Receptor  
589 Signaling in Human T and B Cells. *Journal of immunology* **198**, 657-668 (2017).  
590
- 591 53. Chen J, *et al.* NR4A transcription factors limit CAR T cell function in solid tumours.  
592 *Nature* **567**, 530-534 (2019).

593

594

595

596

597

598

599

600

601

602

603

604

605

606

607

608

609

610

611

612

613

614

615

616

617

618

619

620

621

622

623

624

625

626

627

628

629

630

631

632

633

634

635

636

637

638

639

640

641

54. Liu X, *et al.* Genome-wide analysis identifies NR4A1 as a key mediator of T cell dysfunction. *Nature* **567**, 525-529 (2019).
55. Moran AE, *et al.* T cell receptor signal strength in Treg and iNKT cell development demonstrated by a novel fluorescent reporter mouse. *The Journal of experimental medicine* **208**, 1279-1289 (2011).
56. Guo XZ, Dash P, Calverley M, Tomchuck S, Dallas MH, Thomas PG. Rapid cloning, expression, and functional characterization of paired  $\alpha\beta$  and  $\gamma\delta$  T-cell receptor chains from single-cell analysis. *Molecular therapy Methods & clinical development* **3**, 15054 (2016).
57. Smith EL, *et al.* GPRC5D is a target for the immunotherapy of multiple myeloma with rationally designed CAR T cells. *Science translational medicine* **11**, (2019).
58. Eyquem J, *et al.* Targeting a CAR to the TRAC locus with CRISPR/Cas9 enhances tumour rejection. *Nature* **543**, 113-117 (2017).
59. Roth TL, *et al.* Reprogramming human T cell function and specificity with non-viral genome targeting. *Nature* **559**, 405-409 (2018).
60. Wang J, *et al.* Highly efficient homology-driven genome editing in human T cells by combining zinc-finger nuclease mRNA and AAV6 donor delivery. *Nucleic acids research* **44**, e30 (2016).
61. Koldej RM, *et al.* Comparison of insulators and promoters for expression of the Wiskott-Aldrich syndrome protein using lentiviral vectors. *Human gene therapy Clinical development* **24**, 77-85 (2013).
62. Robert-Richard E, Richard E, Malik P, Ged C, de Verneuil H, Moreau-Gaudry F. Murine retroviral but not human cellular promoters induce in vivo erythroid-specific deregulation that can be partially prevented by insulators. *Molecular therapy : the journal of the American Society of Gene Therapy* **15**, 173-182 (2007).
63. Weber EL, Cannon PM. Promoter choice for retroviral vectors: transcriptional strength versus trans-activation potential. *Human gene therapy* **18**, 849-860 (2007).
64. Zychlinski D, *et al.* Physiological promoters reduce the genotoxic risk of integrating gene vectors. *Molecular therapy : the journal of the American Society of Gene Therapy* **16**, 718-725 (2008).
65. Larson SM, *et al.* Pre-clinical development of gene modification of haematopoietic stem cells with chimeric antigen receptors for cancer immunotherapy. *Human vaccines & immunotherapeutics* **13**, 1094-1104 (2017).
66. Thomas S, Stauss HJ, Morris EC. Molecular immunology lessons from therapeutic T-cell receptor gene transfer. *Immunology* **129**, 170-177 (2010).



- 642 67. Kagoya Y, *et al.* A novel chimeric antigen receptor containing a JAK-STAT signaling  
643 domain mediates superior antitumor effects. *Nature medicine* **24**, 352-359 (2018).  
644
- 645 68. Jutz S, *et al.* Assessment of costimulation and coinhibition in a triple parameter T cell  
646 reporter line: Simultaneous measurement of NF-kappaB, NFAT and AP-1. *Journal of*  
647 *immunological methods* **430**, 10-20 (2016).  
648  
649

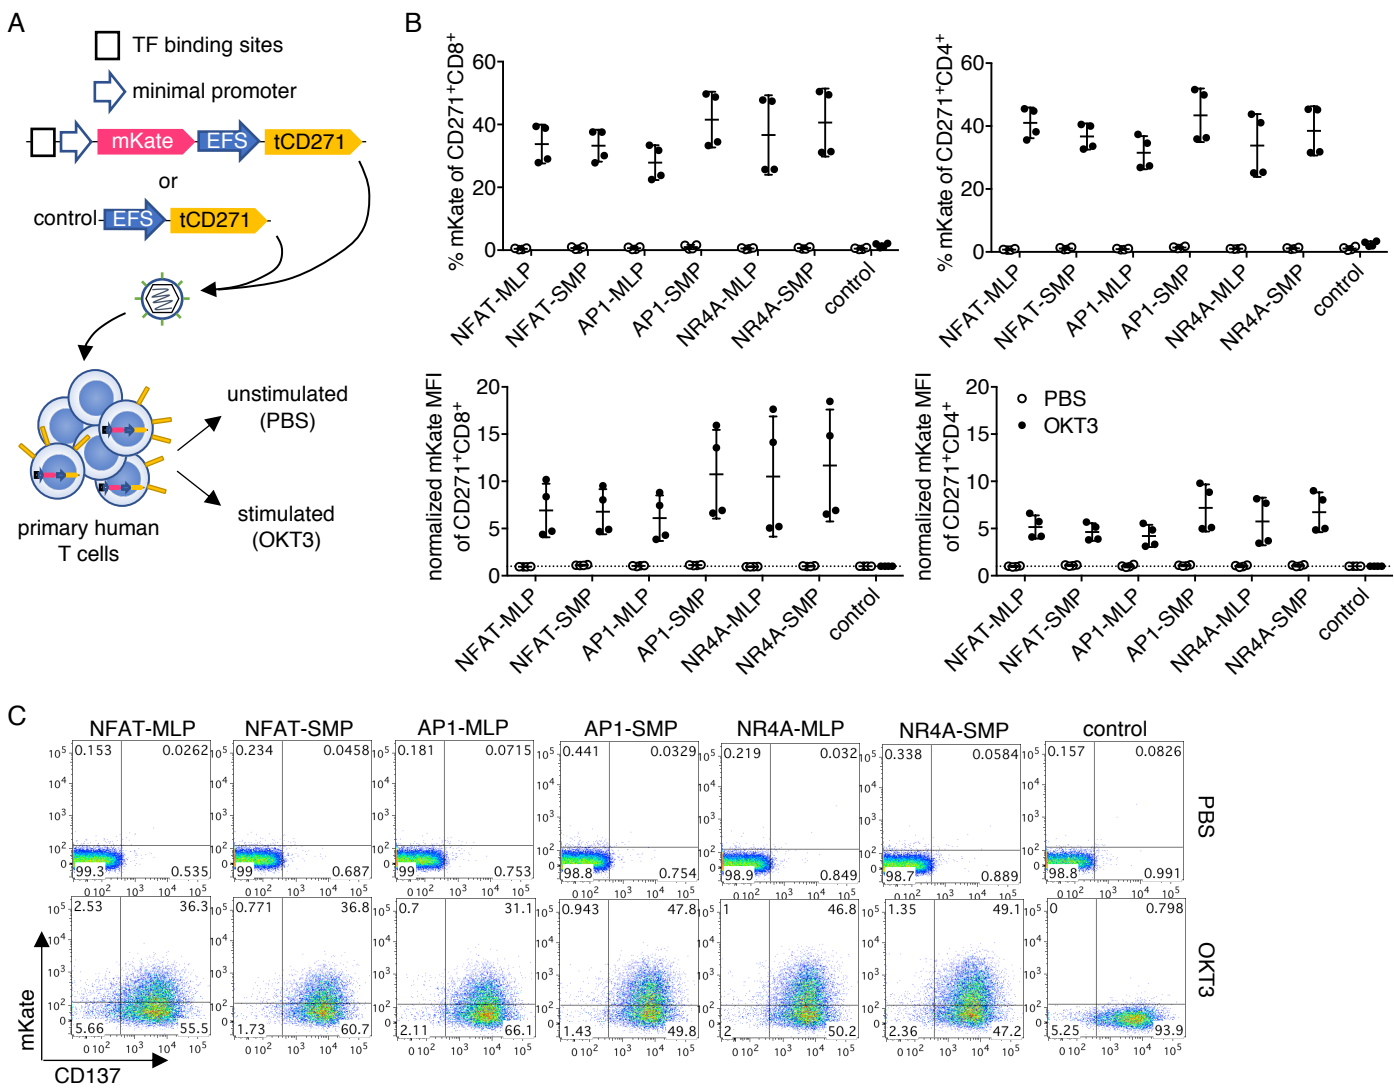

**Figure 1. NFAT, AP1, and NR4A-based promoters are activated by anti-CD3 stimulation with minimal background.** **a** Vector and experimental schematics. Response elements encoding NFAT, AP1, or NR4A-binding sites were cloned with either a core promoter from the adenovirus-derived major late promoter (MLP) or a synthetic minimal promoter (SMP). Lentiviral vectors were transduced into primary human T cells, and cells were treated with PBS or anti-CD3 clone OKT3. **b** Reporter fluorescence in transduced (CD271<sup>+</sup>) CD8<sup>+</sup> or CD4<sup>+</sup> cells was measured after 24 hours. **c** Representative flow plots gated on CD271<sup>+</sup>CD8<sup>+</sup> T cells are shown. Lines and error bars denote mean  $\pm$  standard deviation. n=4 from 2 independent donors tested in 2 technical replicates.

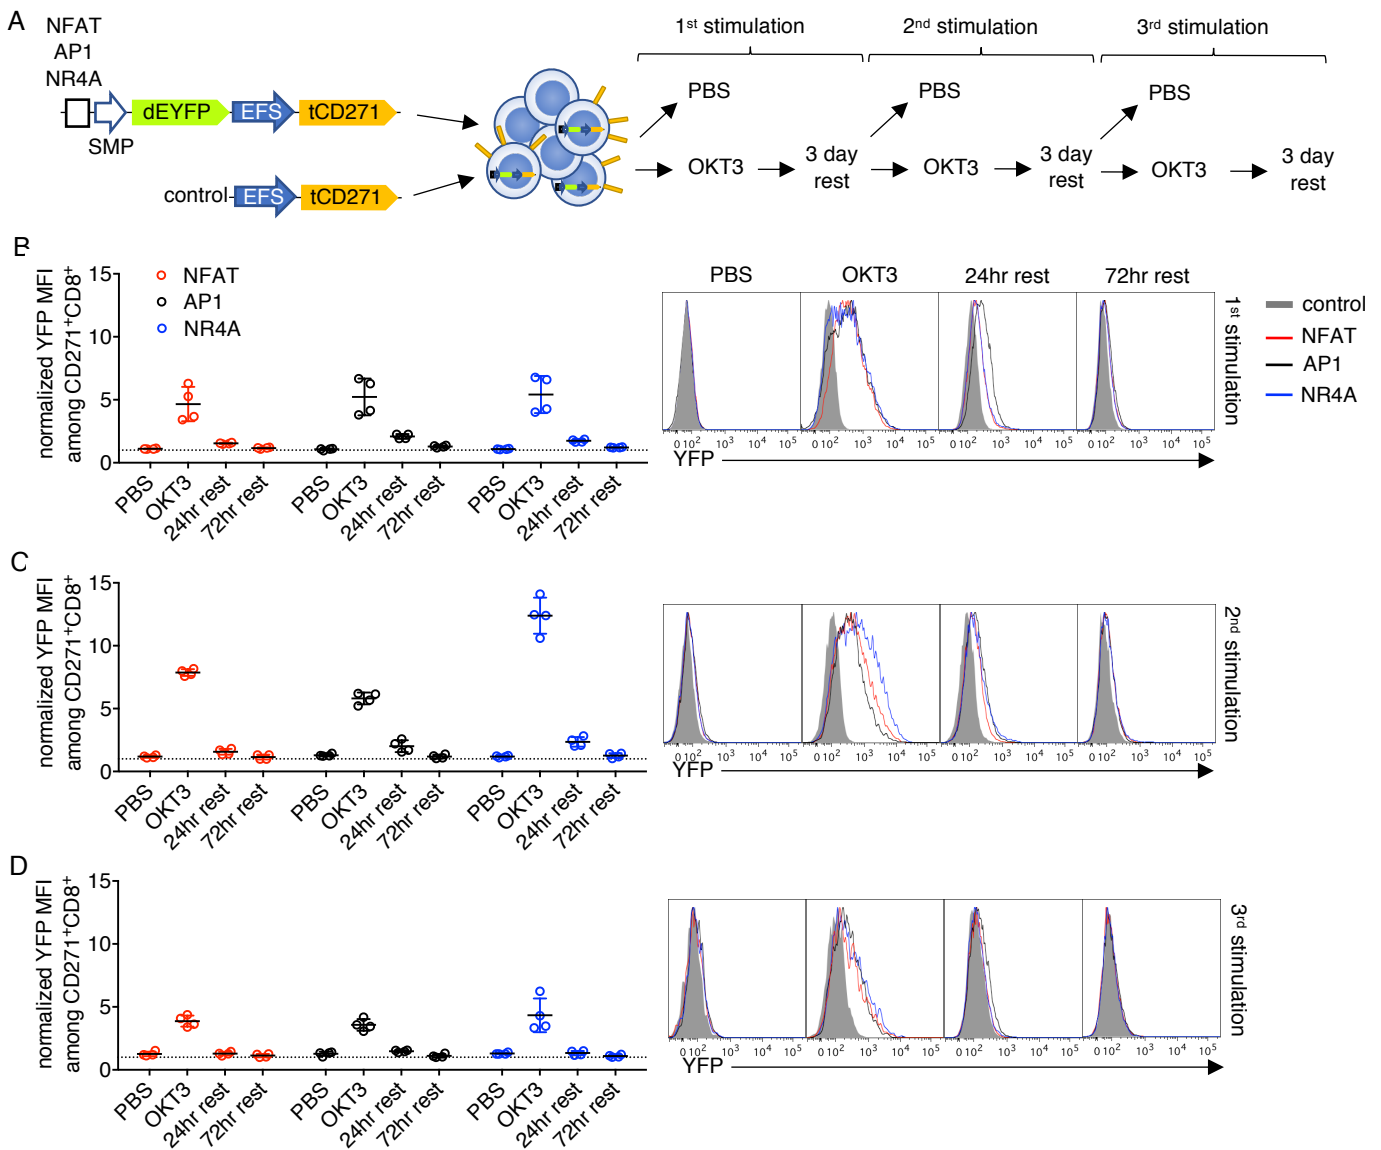

**Figure 2. Inducible promoter responses are reversible and repeatable.** **a** Vector and experimental schematics. Response elements encoding NFAT, AP1, or NR4A-binding sites with the synthetic minimal promoter (SMP) were used to drive destabilized yellow fluorescence protein (dEYFP). Lentiviral vectors were transduced into primary human T cells, and cells were treated with PBS or anti-CD3 clone OKT3 for 24 hours, then transferred to a fresh plate to rest for up to 3 days before repeating the process two more times. **b-d** Reporter fluorescence in CD271<sup>+</sup>CD8<sup>+</sup> cells was measured after 24 hours of stimulation, then after 24 and 72 hours of rest, following the first (**a**), second (**b**), and third (**c**) round. Fluorescence intensity was normalized to that of control vector transductants. Representative histograms gated on CD271<sup>+</sup>CD8<sup>+</sup> T cells are shown. Lines and error bars denote mean  $\pm$  standard deviation.  $n=4$  from 2 independent donors tested in 2 technical replicates.

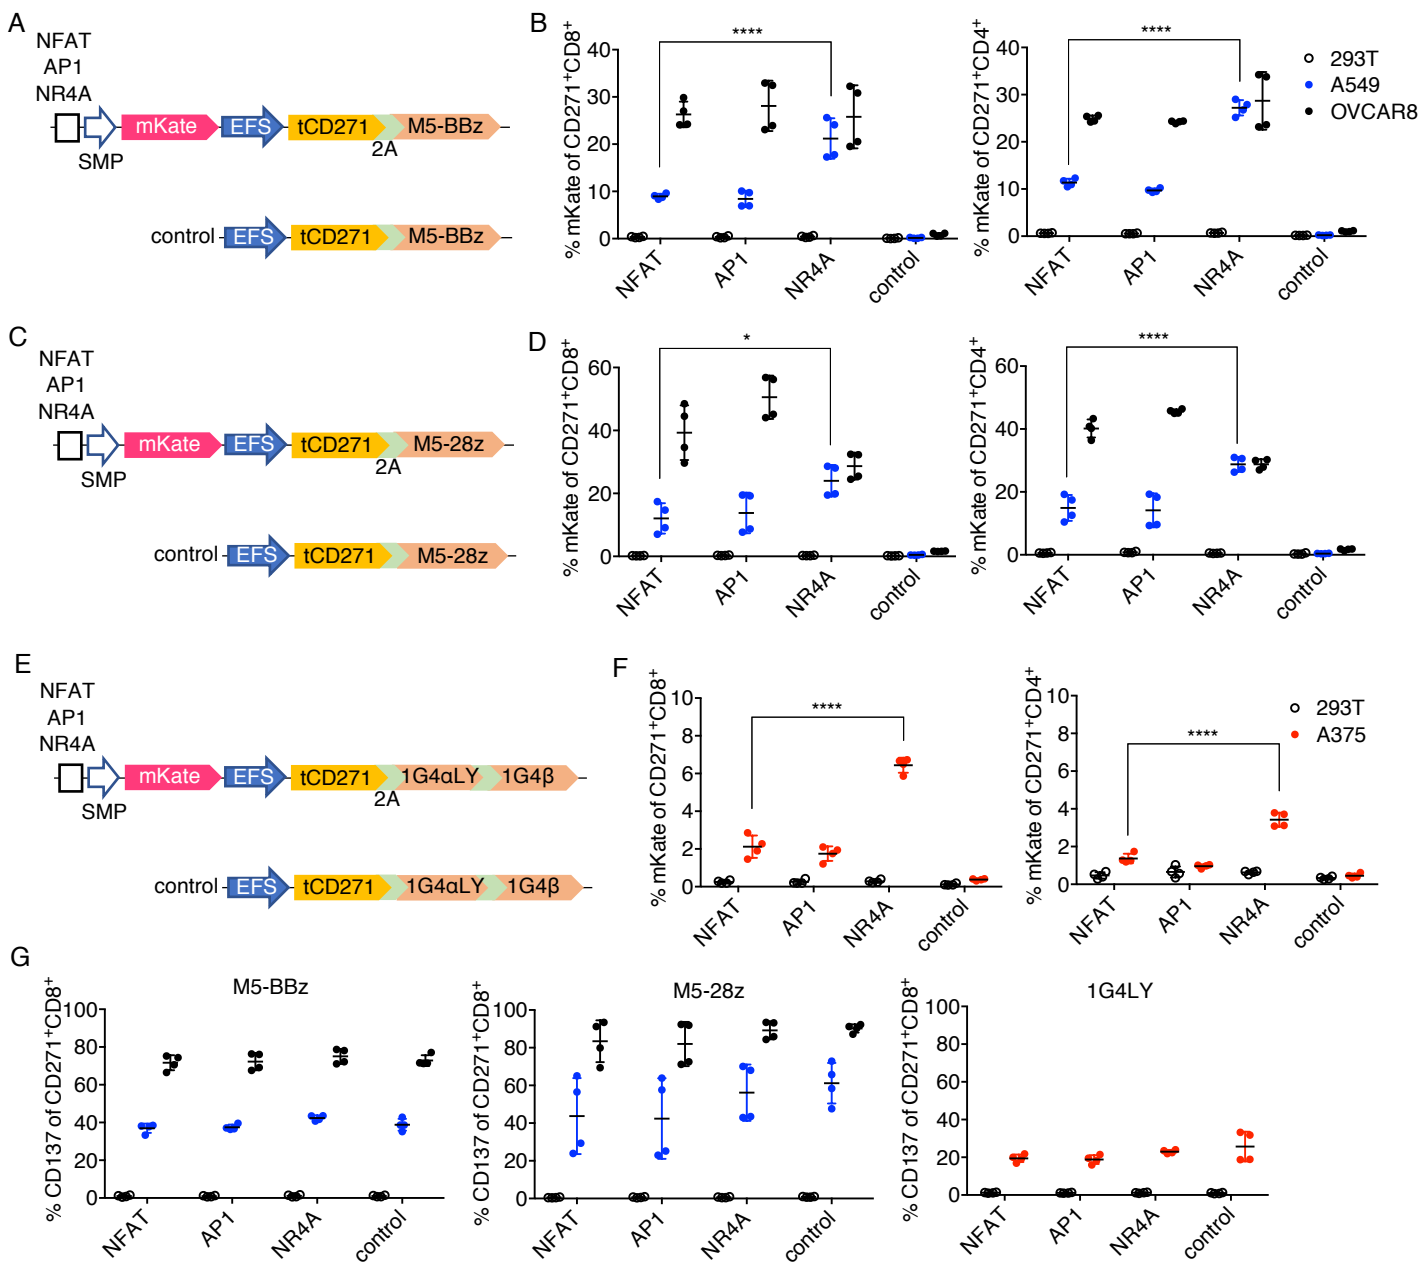

**Figure 3. NR4A-based promoter induces higher responses than NFAT or AP1 in weakly stimulatory TCR/CAR-T models.** **a,c,e** Schematics for CAR or TCR and inducible module encoded within a single vector. **b,d,f** Primary human T cells transduced with the vectors shown on the left of respective graphs were co-cultured with the indicated target cells, and mKate fluorescence was measured after 24 hours for CD271<sup>+</sup>CD8<sup>+</sup> or CD4<sup>+</sup> subsets. **g** CD137 expression on CD271<sup>+</sup>CD8<sup>+</sup> T cells from the same experiments shown in panels **b**, **d**, and **f**. Lines and error bars denote mean  $\pm$  standard deviation. \* $P < 0.05$ , \*\*\*\* $P < 0.0001$  by two-way ANOVA adjusted for all possible comparisons using Tukey's test.  $n = 4$  from 2 independent donors tested in 2 technical replicates.

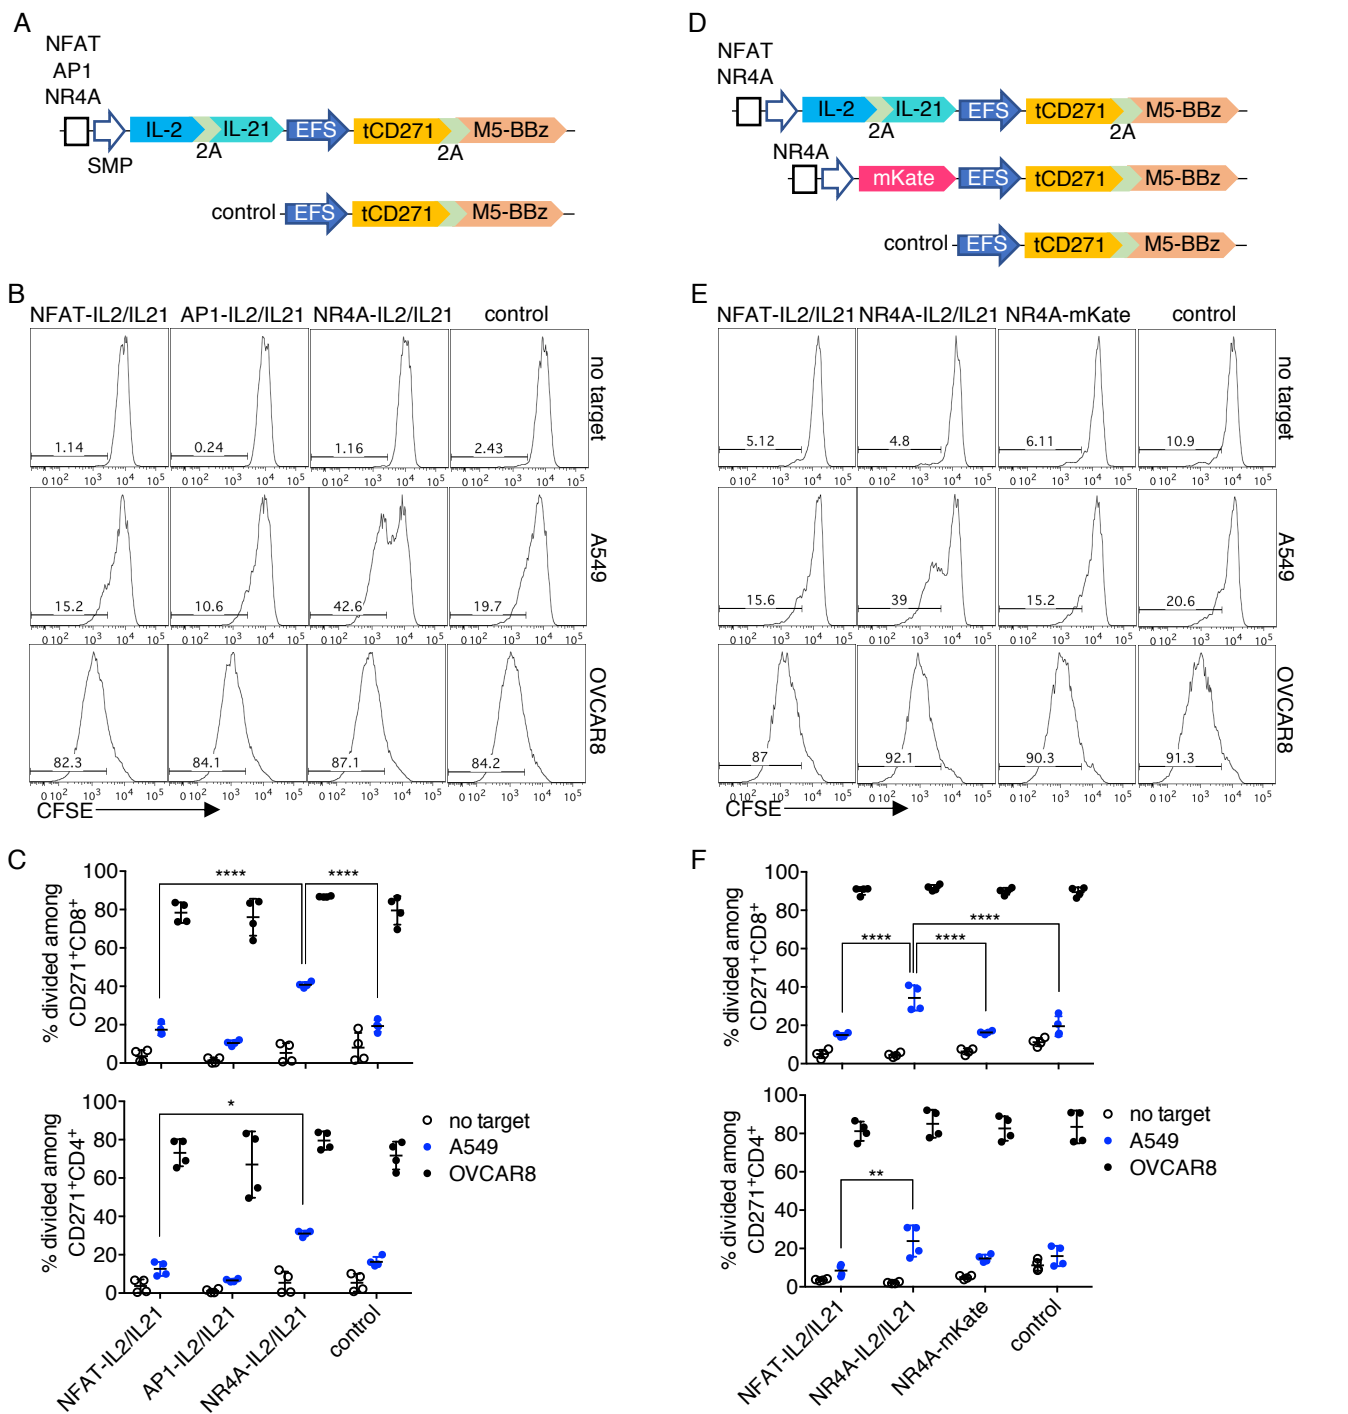

**Figure 4. Cytokines delivered by the NR4A-based promoter amplify weak antigen-specific responses.** **a** Schematics for vectors encoding M5-BBz CAR with or without IL-2 and IL-21 as inducible payloads. **b** Primary human T cells transduced with the vectors shown in **a** were labeled with CFSE and co-cultured with the indicated target cells. Dye dilution was measured after 4 days of co-culture. Representative histograms gated on CD271<sup>+</sup>CD8<sup>+</sup> T cells are shown. **c** Quantification of CFSE dilution in CD271<sup>+</sup>CD8<sup>+</sup> or CD4<sup>+</sup> subsets. **d** Schematics for vectors encoding IL-2 and IL-21 as inducible payloads or mKate as a control. **e** Experiment was performed as described in **b**. Representative histograms gated on CD271<sup>+</sup>CD8<sup>+</sup> T cells are shown. **f** Quantification of CFSE dilution in CD271<sup>+</sup>CD8<sup>+</sup> or CD4<sup>+</sup> subsets. Lines and error bars denote mean  $\pm$  standard deviation. \* $P < 0.05$ , \*\* $P < 0.01$ , \*\*\*\* $P < 0.0001$  by two-way ANOVA adjusted for all possible comparisons using Tukey's test.  $n = 4$  from 2 independent donors tested in 2 technical replicates.

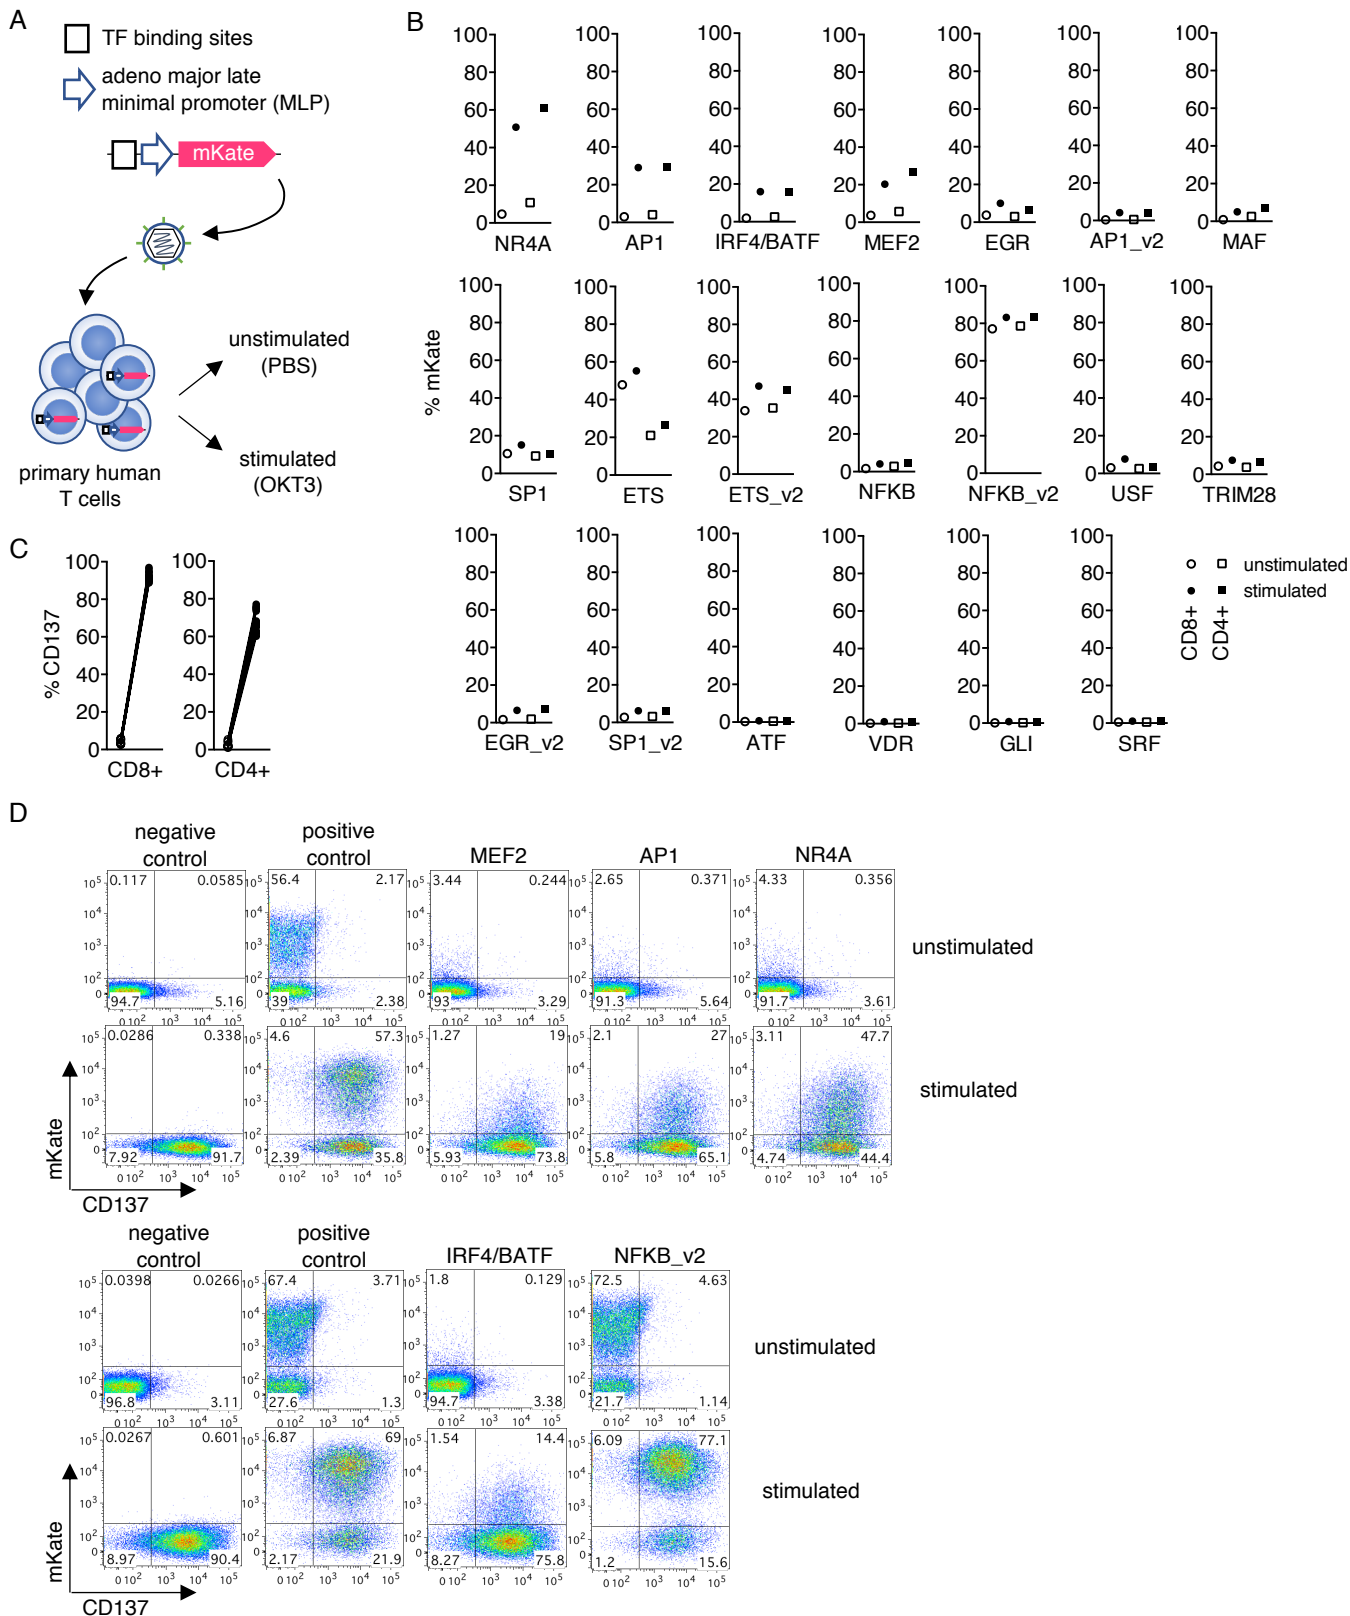

**Supplementary Figure 1. Screening for novel TCR-inducible response elements.** **a** Schematics for vector design from the SPECS library and experimental setup. **b** Primary human T cells transduced with a panel of vectors were treated with PBS (unstimulated, open symbols) or OKT3 (stimulated, filled symbols) for 24 hours, and mKate fluorescence in the CD8<sup>+</sup> (circles) or CD4<sup>+</sup> (squares) subset was quantified. **c** CD137 expression after PBS (open) or OKT3 (filled) treatment. Measurements are matched by the same vector. **d** Raw flow plots gated on CD8<sup>+</sup> T cells for several notable promoters are shown. The positive control vector encodes the constitutive UBC promoter to express mKate, whereas the negative control vector lacks mKate.

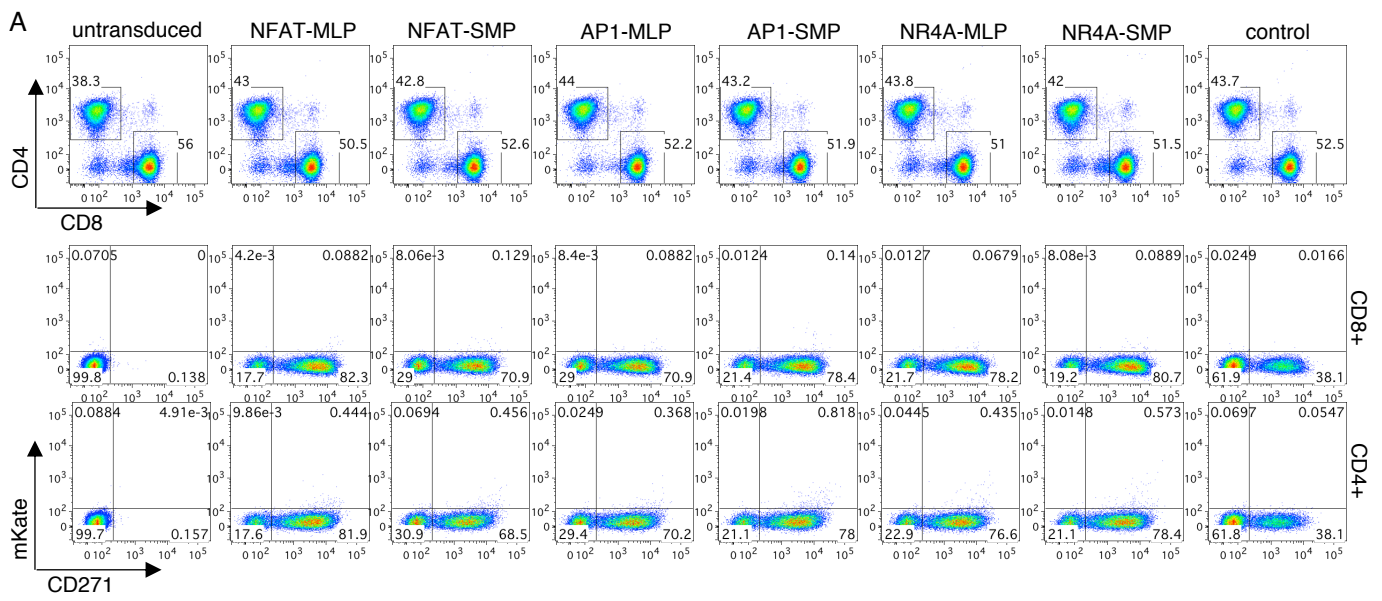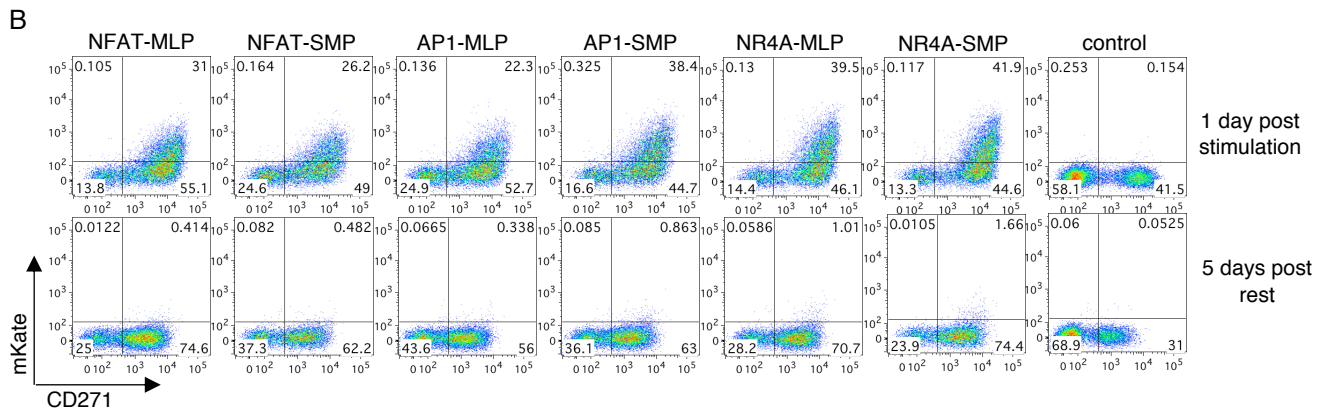

**Supplementary Figure 2. Gating strategy, transduction efficiency, and mKate stability.** **a** CD4<sup>+</sup> or CD8<sup>+</sup> T cells are gated as shown on the top row. Transduction efficiency measured by CD271 positivity is shown on the bottom rows. **b** Fluorescence of the mKate reporter after one day of OKT3 stimulation and after 5 days of rest upon transfer to fresh wells is shown for representative CD8<sup>+</sup> cells.

A

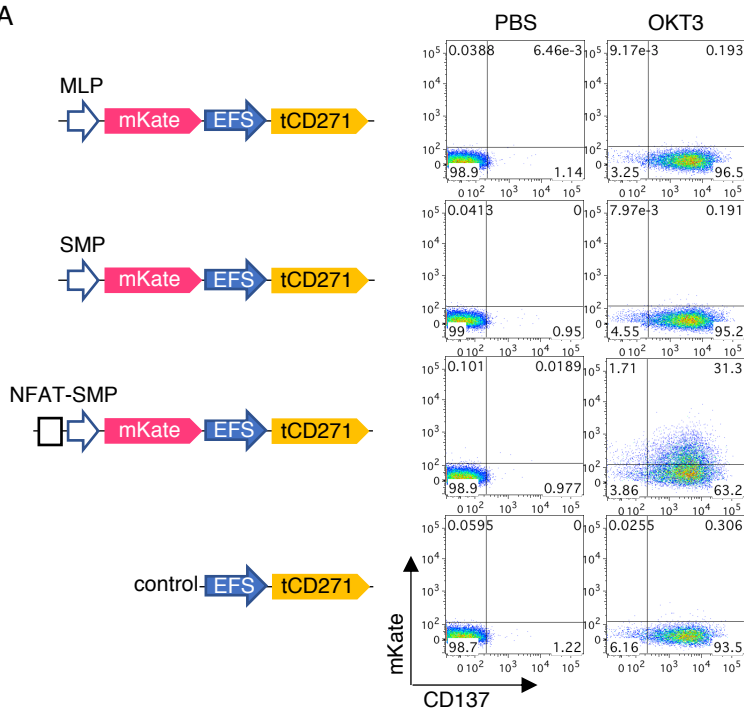

B

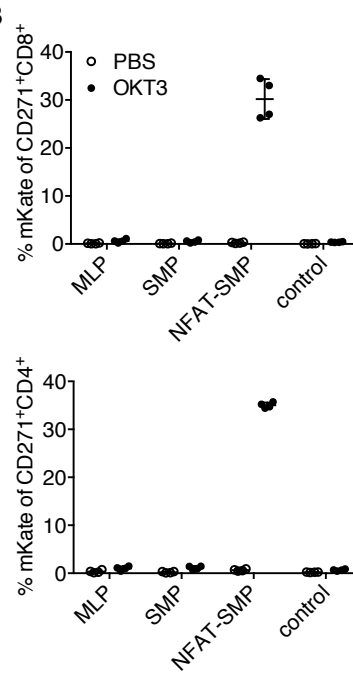

**Supplementary Figure 3. The EFS constitutive promoter do not possess detectable enhancer-like activity.** **a** Primary human T cells transduced with the indicated vector shown on the left were treated with PBS or OKT3. CD137 and mKate upregulation was measured after 24 hours. Representative flow plots gated on CD271+CD8+ cells are shown on the right. **b** Quantification of data shown in panel **a**. Lines and error bars denote mean  $\pm$  standard deviation. n=4 from 2 independent donors tested in 2 technical replicates.



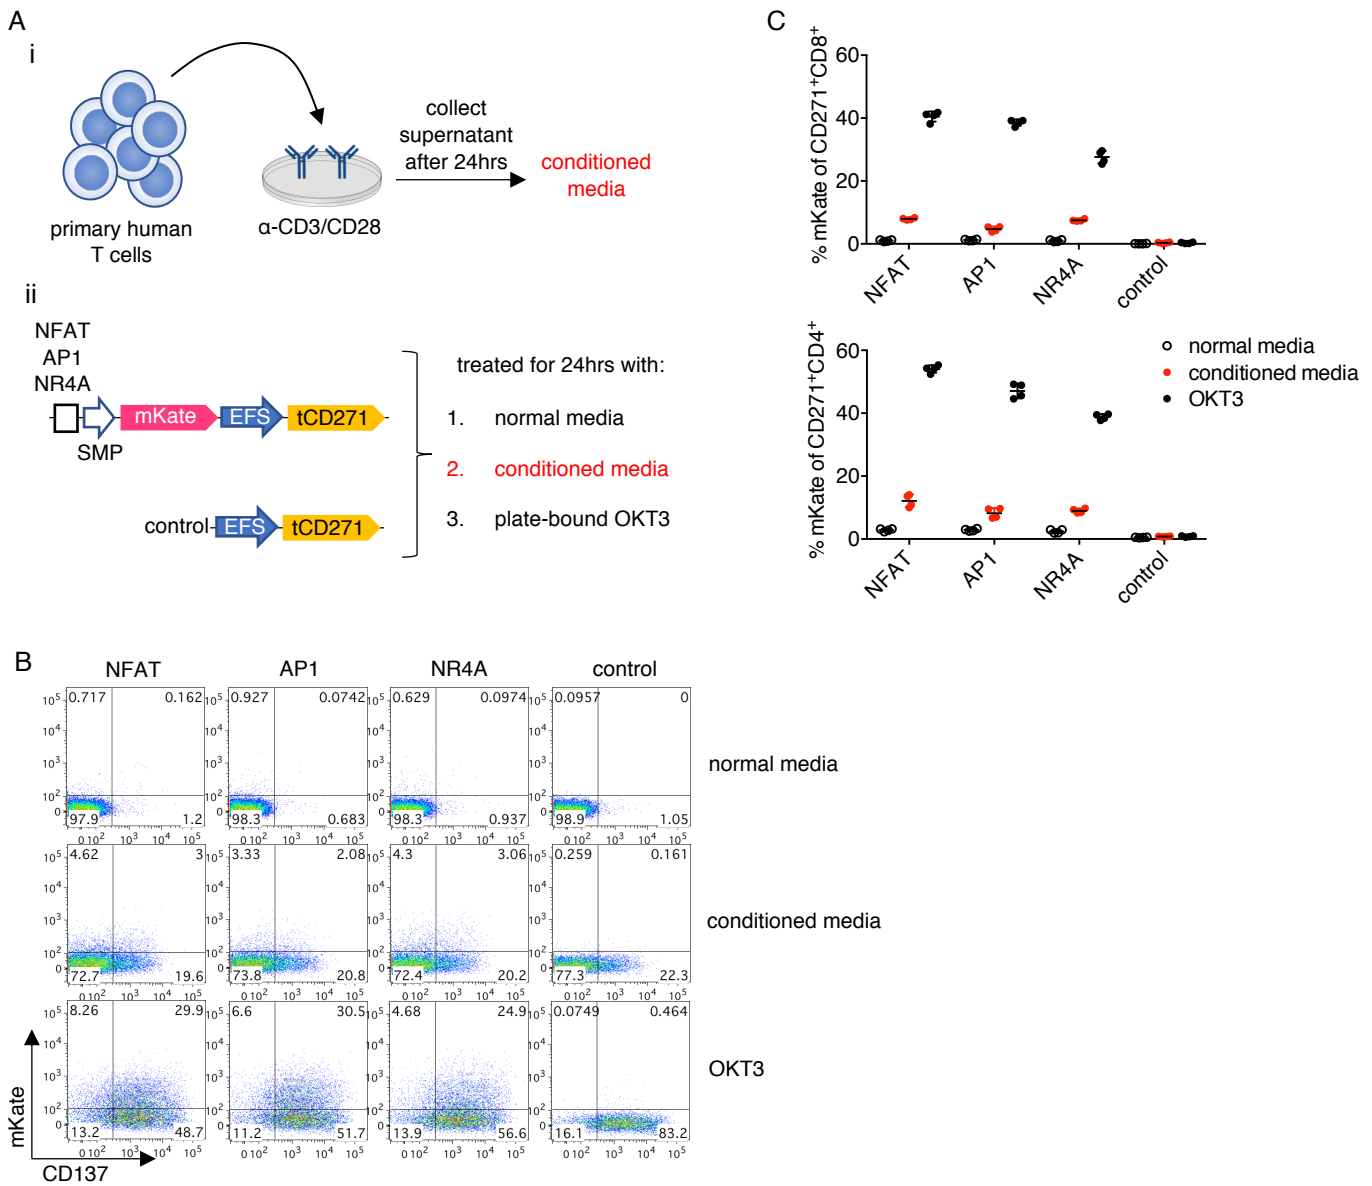

**Supplementary Figure 4. TCR-inducible promoters are weakly activated by an inflammatory milieu.** **a** Experimental design. **i**) Conditioned media was generated by collecting the supernatant from expanded primary human T cells restimulated with plate-bound anti-CD3/CD28 monoclonal antibodies. **ii**) Promoter or control transduced T cells were cultured with normal media, conditioned media, or plate-bound OKT3. **b** Representative flow plots gated on CD271<sup>+</sup>CD8<sup>+</sup> cells are shown. **c** Quantification of data shown in panel **b**. Lines and error bars denote mean  $\pm$  standard deviation.  $n=4$  from 2 independent donors tested in 2 technical replicates.

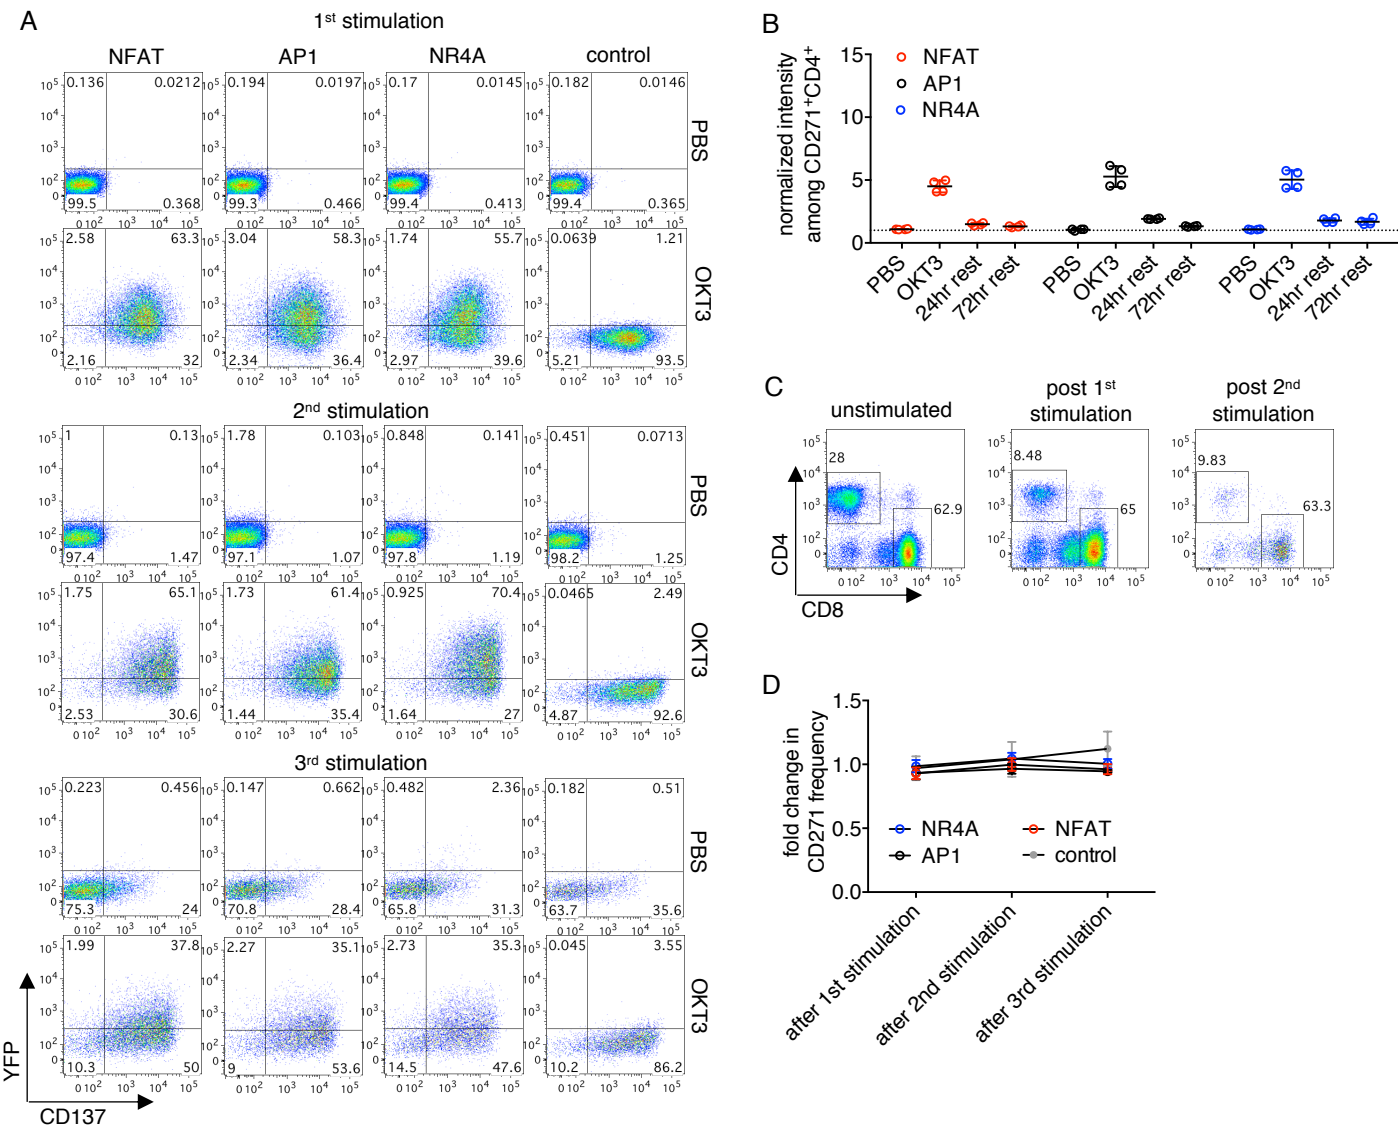

**Supplementary Figure 5. Inducible promoters can be repeatedly stimulated without causing cellular toxicity.** **a** Representative flow plots gated on CD271<sup>+</sup>CD8<sup>+</sup> cells for the PBS and OKT3 conditions in Figure 2B-D are shown. **b** Reversible promoter responses among CD271<sup>+</sup>CD4<sup>+</sup> T cells were measured, as described in the caption of Figure 2, after the first round of stimulation. **c** Representative frequency of CD4<sup>+</sup> and CD8<sup>+</sup> subsets in culture after repeated stimulation. Gated on live cells. Due to the activation-induced cell death and biased outgrowth of CD4<sup>-</sup> cells, CD4<sup>+</sup> cells could not be reliably analyzed after the first round of stimulation. **d** Change in percent of transduced (CD271<sup>+</sup>) cells was tracked through the three rounds of stimulation and remained constant. Frequency was normalized to that at the start of the experiment (prior to first stimulation). Lines and error bars denote mean  $\pm$  standard deviation.  $n=4$  from 2 independent donors tested in 2 technical replicates.

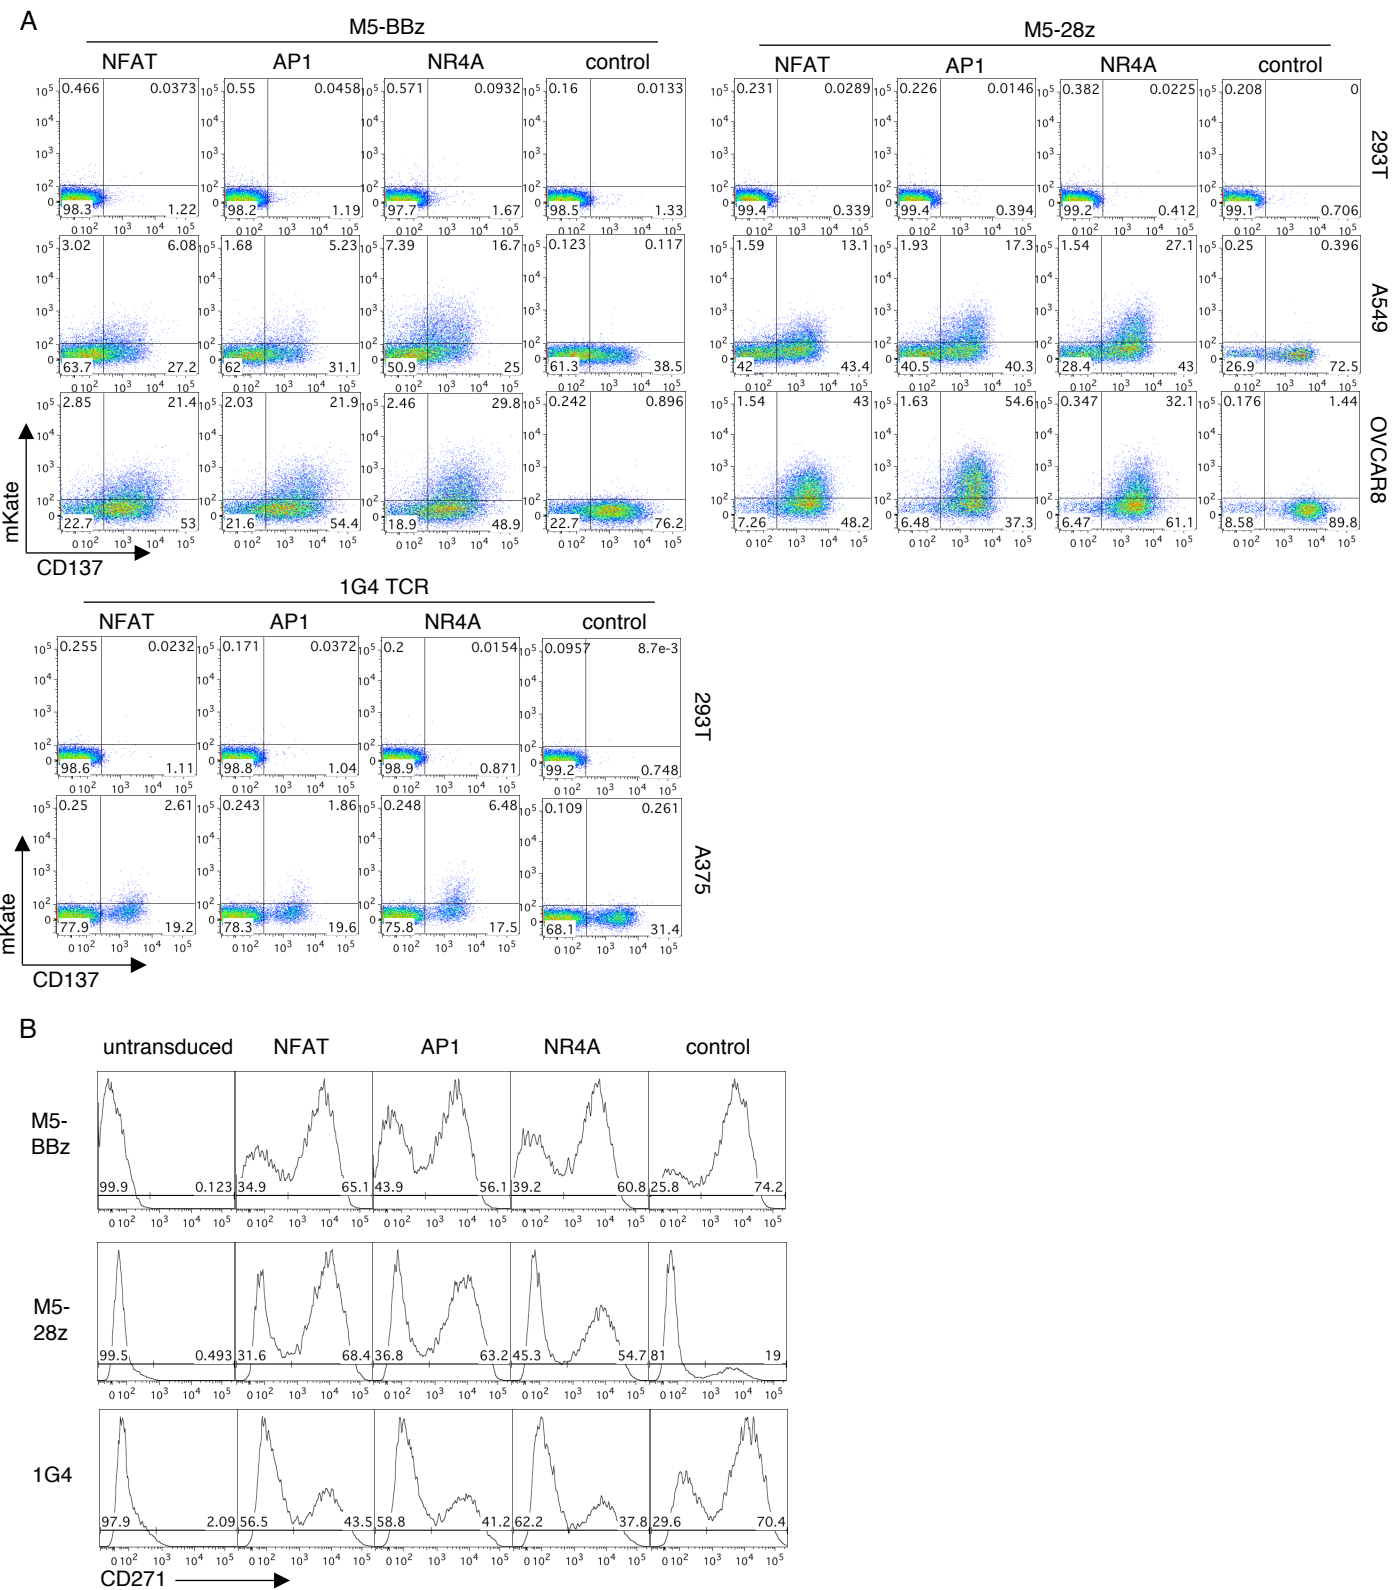

**Supplementary Figure 6. Inducible promoter activities in TCR/CAR-T models.** **a** Representative flow plots gated on CD271+CD8+ cells for data in Figure 3 are shown. **b** Representative transduction efficiencies of the TCR/CAR vectors. Gated on total live cells. Note that the control M5-28z transduction was unexpectedly low. However, this does not affect the interpretation of the data, as the control M5-28z vector mainly serves as a gating control for mKate encoding vectors.

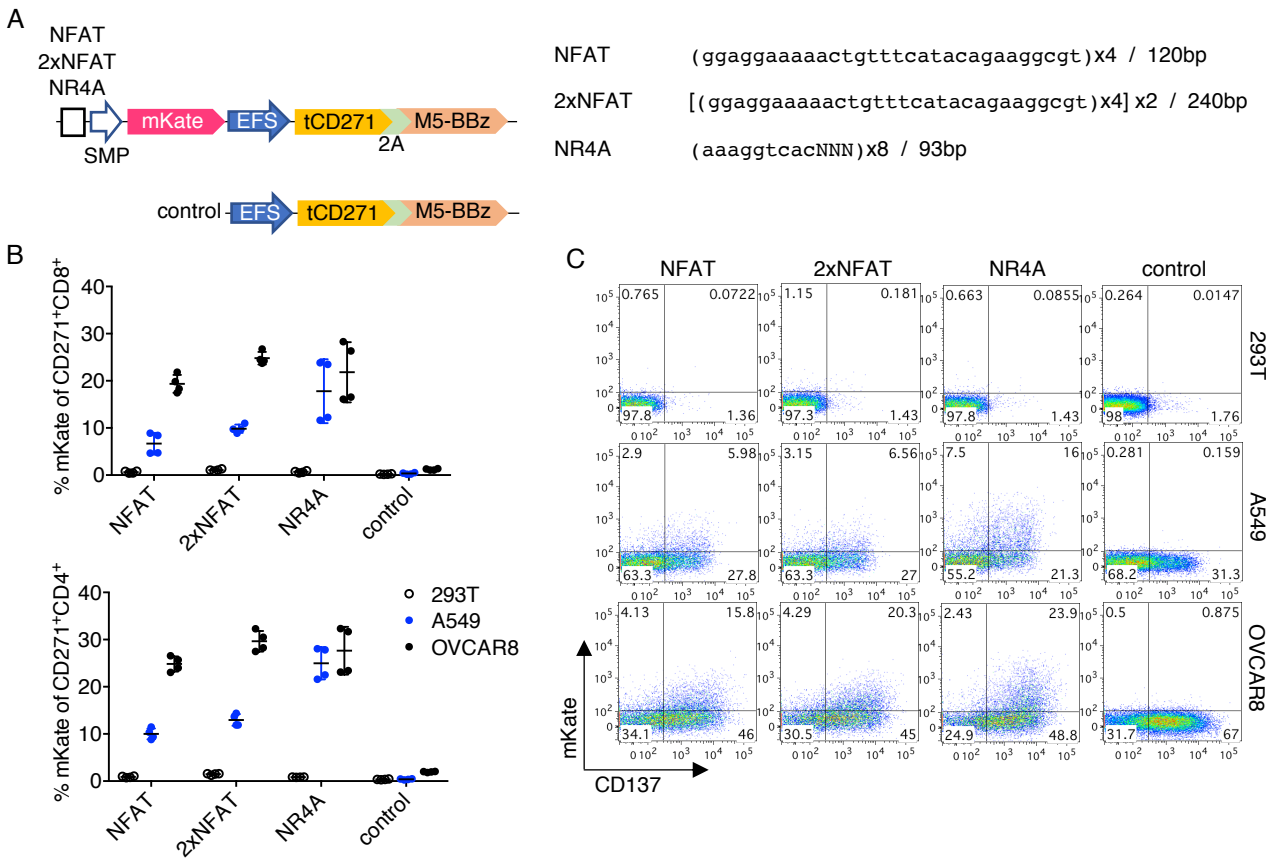

**Supplementary Figure 7. Doubling the number of NFAT binding sites only marginally improves response.** **a** Left, vector schematics. Right, promoter sequences and designs. Two copies of the original NFAT promoter with 4 binding sites were cloned to generate 2xNFAT. The NR4A promoter was derived from the SPECS library, where transcription factor binding motifs were spaced by three random nucleotides. **b** Quantification of reporter responses among CD271<sup>+</sup>CD8<sup>+</sup> or CD4<sup>+</sup> subsets. **c** Representative flow plots gated on CD271<sup>+</sup>CD8<sup>+</sup> cells for data shown in **b**. Lines and error bars denote mean  $\pm$  standard deviation. n=4 from 2 independent donors tested in 2 technical replicates.

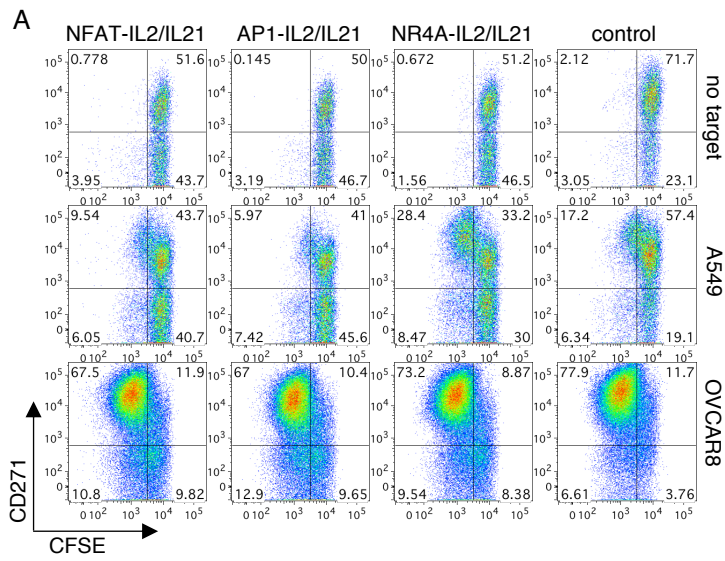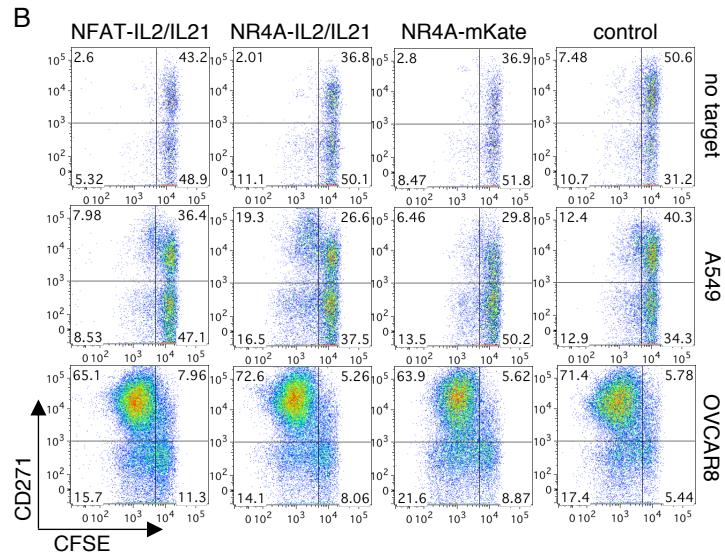

**Supplementary Figure 8. Inducible expression of cytokines augments weak antigen-specific response in CAR-T cells. a** Representative flow plots gated on CD8<sup>+</sup> cells for data in Figure 4A-C are shown. **b** Representative flow plots gated on CD8<sup>+</sup> cells for data in Figure 4D-F are shown.

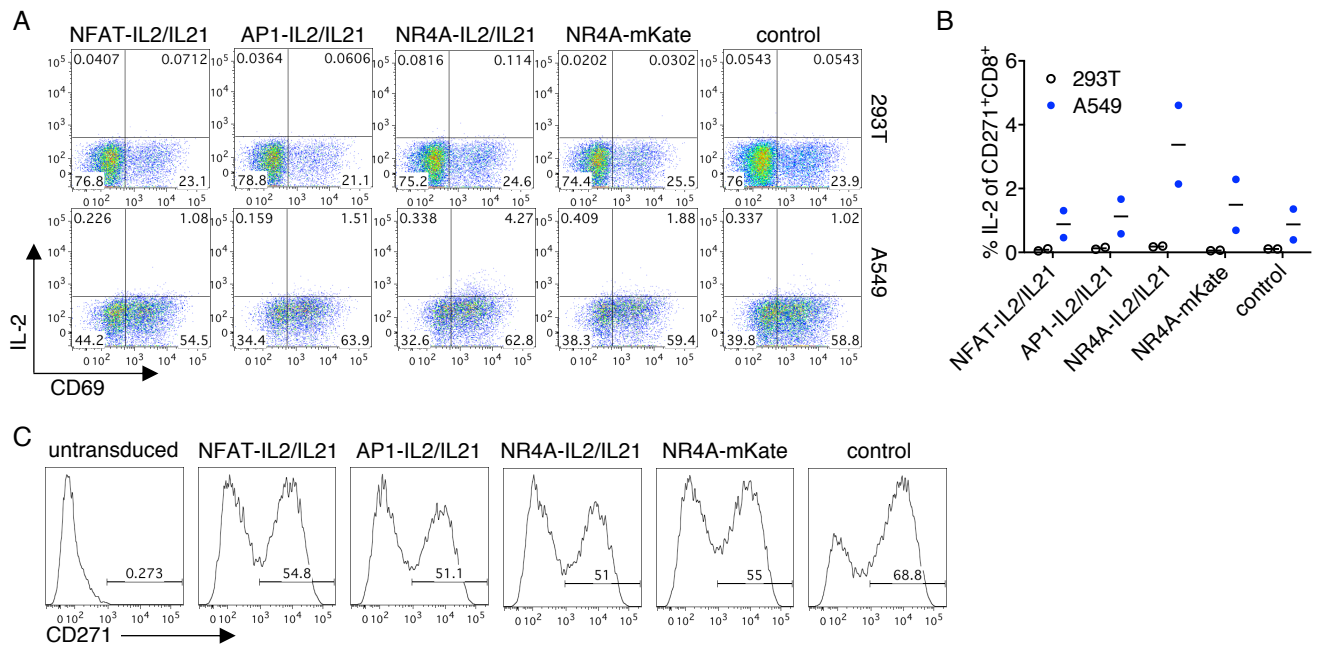

**Supplementary Figure 9. Analyses of inducible payload expression in stimulated CAR-T cells.** a CAR-T cells transduced with inducible IL-2/IL-21 or control constructs were stimulated with 293T or A549 for 18 hours. Monesin was then added, and cells were cultured for another 6 hours before staining. Representative flow plots gated on CD271<sup>+</sup>CD8<sup>+</sup> cells are shown. b Quantification for data shown in a across two independent donors. Lines denote means. c Representative transduction efficiencies of vectors used in this experiment and Figure 4.

| ID          | Ref. | Full sequence                                                                                                                      | Length (bp) | Motif                              |
|-------------|------|------------------------------------------------------------------------------------------------------------------------------------|-------------|------------------------------------|
| <b>AP1</b>  | 20   | TTGAGTCAAGATTGAGTCATCGTTGAGTCAGACTTGAGTCACTATTGAGTCAACTTTGAGTCATGCTTGAGTCAGTATTGAGTCA                                              | 85          | TTGAGTCA                           |
| AP1_v2      |      | GGTGACTCATGAGAGGTGACTCATGTCCGGTGACTCATGGACGGTGACTCATGCTAGGTGACTCATGACTGGTGACTCATGTGCG<br>GTGACTCATGGTAGGTGACTCATG                  | 109         | GGTGACTCATG                        |
| ATF         | 21   | CTCTGACGTCAAGACTCTGACGTCACTCGCTCTGACGTACAGCTCTGACGTCACTACTCTGACGTCAACTCTCTGACGTCAAGC<br>TCTGACGTCACTCTGACGTCA                      | 109         | CTCTGACGTCA                        |
| EGR         | 27   | CCGCCACGCAGACCGCCACGCTCGCCGCCACGCGACCCGCCACGCCTACCGCCACGCACCTCCGCCACGCTGCCCGCCCA<br>CGCGTACCGCCACGC                                | 101         | CCGCCACGC                          |
| EGR_v2      |      | TGCGTGGGCGAGATGCGTGGGCGTCTGCGTGGGCGGACTGCGTGGGCGCTATGCGTGGGCGACTTGGTGGGCGTCTGCGTGG<br>GCGGTATGCGTGGGCG                             | 101         | TGCGTGGGCG                         |
| ETS         | 22   | CCGGAAGAGACCCGGAAGTCGCCGGAAGGACCCGGAAGCTACCGGAAGACTCCGGAAGTGCCCGGAAGGTACCGGAAG                                                     | 77          | CCGGAAG                            |
| ETS_v2      |      | CCGGAAGTGGCAGACCCGGAAGTGGCTCGCCGGAAGTGGCGACCCGGAAGTGGCTACCGGAAGTGGCACTCCGGAAGTGGCTGCC<br>CGGAAGTGGCGTACCGGAAGTGGC                  | 109         | CCGGAAGTGGC                        |
| GLI         | 28   | CCTGGGTGGTCCAGACTGGGTGGTCTCGCTGGGTGGTCCGACCTGGGTGGTCCCTACCTGGGTGGTCCACTCTGGGTGGT<br>CCTGCCCTGGGTGGTCCGTACCTGGGTGGTCC               | 117         | CCTGGGTGGTCC                       |
| IRF4/BATF   | 29   | GAAATGAGTCAAGAGAAATGAGTCATCGAAATGAGTCAGACGAAATGAGTCACTAGAAATGAGTCAACTGAAATGAGTCATGCG<br>AAATGAGTCAGTAGAAATGAGTCA                   | 109         | GAAATGAGTCA                        |
| MAF         | 30   | TGCTGACTCAGCAAGATGCTGACTCAGCATCGTGTGACTCAGCAGACTGCTGACTCAGCACTATGCTGACTCAGCAACTTGCTG<br>ACTCAGCATGCTGCTGACTCAGCAGTATGCTGACTCAGCA   | 125         | TGCTGACTCAGCA                      |
| MEF2        | 23   | ACTATAAATAGAAGAACTATAAATAGATCGACTATAAATAGAGACACTATAAATAGACTAACTATAAATAGAAGTACTATAAATA<br>GATGCACTATAAATAGAGTAACTATAAATAGA          | 117         | ACTATAAATAGA                       |
| NFAT        | 16   | GGAGGAAAAACTGTTTCATACAGAAGGCGTGGAGGAAAAACTGTTTCATACAGAAGGCGTGGAGGAAAAACTGTTTCATACAGAA<br>GGCGTGGAGGAAAAACTGTTTCATACAGAAGGCGT       | 120         | GGAGGAAAAACTGTTTC<br>ATACAGAAGGCGT |
| NFKB        | 24   | GGGGAAATTTCCCTAGAGGGGAAATTTCCCTTCCGGGGAAATTTCCCTTACGCGGGAAATTTCCCTTACGCGGGAAATTTCCCTACT<br>GGGGAAATTTCCCTTCCGGGGAAATTTCCCTTGT      | 119         | GGGGAAATTTCCCT                     |
| NFKB_v2     |      | AGGGGATTTCCAAGGAGAAGGGGATTTCCAAGGTTCGAGGGGATTTCCAAGGGACAGGGGATTTCCAAGGCTAAGGGGATTTCCAA<br>GGACTAGGGGATTTCCAAGGTGCAGGGGATTTCCAAGGGT | 126         | AGGGGATTTCCAAGG                    |
| <b>NR4A</b> | 31   | AAAGGTCACAGAAAAGGTCACTCGAAAGGTCACGACAAAAGGTCACCTAAAAGGTCACACTAAAGGTCACTGCAAAGGTCACGTAA<br>AAGGTCAC                                 | 93          | AAAGGTCAC                          |
| SP1         | 32   | AAGTGGGCGTGGCCAGAAAGTGGGCGTGGCCTCGAAGTGGGCGTGGCCGACGGCGTGGCCCTAAAGTGGGCGTGGCCACTAATGG<br>GCGTGGCCTGCAAGTGGGCGTGGCCGTA              | 113         | AAGTGGGCGTGGCC                     |
| SP1_v2      |      | CCCTCCCCAAGGCTAGACCCTCCCCAAGGCTTCGCCCTCCCCAAGGCTGACCCCTCCCCAAGGCTCTACCCTCCCCAAGGCTACT<br>CCCTCCCCAAGGCTTGGCCCTCCCCAAGCTGTA         | 118         | CCCTCCCCAAGGCT                     |
| SRF         | 25   | ATGCCCATATATGGAAGAATGCCCATATATGGATCGATGCCCATATATGGAGACATGCCCATATATGGACTAATGCCCATATATG<br>GAATATGCCCATATATGGATGCATGCCCATATATGGAGTA  | 126         | ATGCCCATATATGGA                    |
| TRIM28      | 33   | GGTTTCTCTAGAGGTTTCTCTTCCGGTTTCTCTGACGGTTTCTCTCTAGGTTTCTCTACTGGTTTCTCTTGGGTTTCTCTGTA<br>GGTTTCTCT                                   | 94          | GGTTTCTCT                          |
| USF         | 26   | GGTCACGTGACAGAGGTACAGTACTCGGGTACAGTACGACGGTACAGTACCTAGGTACAGTACACTGGTACAGTACTGCG<br>GTCACGTGACGTAGGTACAGTAC                        | 109         | GGTCACGTGAC                        |
| VDR         | 34   | GGGTTACCGGGAGAGGGTTACCGGGTTCGGGGTTCACCGGGACGGGTTACCTGGCTAGGGTTACCGGGACTGGGTTACCGG<br>GGTTCGGGTTACCGGGTAGGGTTACCGGG                 | 117         | GGGTTACCGGG                        |

**Supplementary Table 1. Transcription factor (TF) binding site sequences.** Sequences and length for the promoters studied in Supplementary Figure 1 and the conventional NFAT promoter are shown. Bolded promoters were studied in the main figures. References for association of respective TF pathway with TCR signaling are listed.
